# 1            **Degradation of Fatty Acid Export Protein1 by Rhomboid-Like**

## 2            **Protease11 Contributes to Cold Tolerance in Arabidopsis**

3  
4    **Annalisa John<sup>a</sup>, Moritz Krämer<sup>b</sup>, Martin Lehmann<sup>b</sup>, Hans-Henning Kunz<sup>b</sup>, Fayeze**  
5    **Aarabi<sup>c</sup>, Saleh Alseekh<sup>c</sup>, Alisdair Fernie<sup>c</sup>, Frederik Sommer<sup>d</sup>, Michael Schroda<sup>d</sup>,**  
6    **David Zimmer<sup>e</sup>, Timo Mühlhaus<sup>e</sup>, Helga Peisker<sup>f</sup>, Katharina Gutbrod<sup>f</sup>, Peter**  
7    **Dörmann<sup>f</sup>, Jens Neunzig<sup>g</sup>, Katrin Philippar<sup>g</sup> and H. Ekkehard Neuhaus<sup>a\*</sup>**

8  
9    <sup>a</sup> Plant Physiology, University of Kaiserslautern, Erwin-Schrödinger-Str., D-67653 Kaisers-  
10    lautern, Germany

11    <sup>b</sup> Plant Biochemistry, Faculty of Biology, Ludwig-Maximilians-Universität Munich, 82152  
12    Planegg-Martinsried, Germany

13    <sup>c</sup> Max Planck Institut for Molecular Plant Physiology, Wissenschaftspark Golm, D-14476  
14    Potsdam, Germany

15    <sup>d</sup> Molecular Biotechnology and Systems Biology, University of Kaiserslautern, Erwin-  
16    Schrödinger-Str., D-67653 Kaiserslautern, Germany

17    <sup>e</sup> Computational Systems Biology, University of Kaiserslautern, Erwin-Schrödinger-Str.,  
18    D-67653 Kaiserslautern, Germany

19    <sup>f</sup> Institute for Molecular Physiology and Biotechnology of Plants, IMBIO, University of  
20    Bonn, Karlrobert-Kreiten-Str. 13, D-53115 Bonn, Germany

21    <sup>g</sup> Plant Biology, Center for Human and Molecular Biology (ZHMB), Saarland University,  
22    D-66123 Saarbrücken, Germany

23  
24    \* Address correspondence to:

25    Ekkehard Neuhaus, University of Kaiserslautern, Plant Physiology, Gottlieb Daimler-Str.  
26    47, D-67653 Kaiserslautern, Germany

27    Tel.: +49-631-2052372

28    Fax: +49-631-205-2600

29    E-mail: neuhaus@rhrk.uni-kl.de

30    **Short title:** RBL11 regulates FAX1 protein abundance in cold

31 **One sentence summary:** Degradation of the inner envelope protein Fatty Acid Export1  
32 via Rhomboid Like Protease11 represents a critical process to achieve cold and frost  
33 tolerance in Arabidopsis

34

35 The author responsible for distribution of materials integral to the findings presented in  
36 this article in accordance with the policy described in the Instructions for Authors is:  
37 Ekkehard Neuhaus (neuhaus@rhrk.uni-kl.de).

38

39 **Abstract**

40 Plants need to adapt to different stresses to optimize growth under unfavorable conditions.  
41 The abundance of the chloroplast envelope located Fatty Acid Export Protein1 (FAX1)  
42 decreases after the onset of low temperatures. However, it was unclear how FAX1  
43 degradation occurs and whether altered FAX1 abundance contributes to cold tolerance in  
44 plants. The rapid cold-induced increase in rhomboid-like protease11 (RBL11) transcript,  
45 the physical interaction of RBL11 with FAX1, the specific FAX1 degradation after RBL11  
46 expression, and the absence of cold-induced FAX1 degradation in *rb11* loss-of-function  
47 mutants suggest that this enzyme is responsible for FAX1 degradation. Proteomic  
48 analyses showed that *rb11* mutants have higher levels of FAX1 and other proteins  
49 involved in membrane lipid homeostasis, suggesting that RBL11 is a key element in the  
50 remodeling of membrane properties during cold. Consequently, in the cold, *rb11* mutants  
51 show a shift in lipid biosynthesis towards the eukaryotic pathway, which coincides with  
52 impaired cold tolerance. To demonstrate that cold sensitivity is due to increased FAX1  
53 levels, FAX1 overexpressors were analyzed. *rb11* and FAX1 overexpressor mutants  
54 show superimposable phenotypic defects upon exposure to cold temperatures. Our re-  
55 sults show that the cold-induced degradation of FAX1 by RBL11 is critical for Arabidopsis  
56 to survive cold and freezing periods.

57

## 58 Introduction

59 The vast majority of vascular plants are sessile. One of their most remarkable  
60 characteristics is their ability to cope with a wide range of environmental conditions. When  
61 light intensity, temperature, or water and nutrient availability leave certain ranges,  
62 corresponding stress stimuli trigger systemic responses such as genetic, metabolic, and,  
63 to some extent, morphological changes. These processes lead to a new metabolic  
64 homeostasis that allows the plant to successfully cope with the environmental challenge  
65 (Obata and Fernie, 2012; Koevoets et al., 2016; Choudhury et al., 2017; Pommerrenig et  
66 al., 2018; Garcia-Molina et al., 2020; Wang et al., 2020).

67 Changes in growth temperature are usually more rapid than changes in water or nutrient  
68 availability. Accordingly, plants must rapidly initiate appropriate acclimation programs.  
69 These efficient molecular responses are essential because temperature affects the two  
70 main processes of photosynthesis, i.e., the light-driven electron transport across the  
71 thylakoid membrane and the subsequent enzyme-catalyzed Calvin-Benson cycle, in  
72 different ways. Thus, photosynthesis is markedly responsive to temperature changes, as  
73 demonstrated in several species representing a broad spectrum of CO<sub>2</sub>-fixing organisms  
74 (Lin et al., 2012; Mackey et al., 2013; Walker et al., 2013; Song et al., 2014).

75 It is well-known that the composition of membrane lipids in plant cells exhibits a dynamic  
76 remodeling after onset of low temperatures (Moellering et al., 2010; Li et al., 2015; Barnes  
77 et al., 2016; Barrero-Sicilia et al., 2017). These structural changes comprise a higher  
78 degree of desaturation and altered abundancies of different phospho-, sulfo- or galacto-  
79 lipid species, which ensure sufficient extent of membrane fluidity under unfavorable  
80 environmental conditions (Smallwood and Bowles, 2002).

81 In plants, lipid biosynthesis represents a complex metabolic network in which initial  
82 metabolic steps in the plastids (e.g., chloroplasts) are connected to subsequent processes  
83 at the Endoplasmic Reticulum (ER) (Li-Beisson et al., 2010; Nakamura, 2017; Hölzl and  
84 Dörmann, 2019; Lavell and Benning, 2019). Generally, for the *de novo* synthesis of both  
85 classes of lipids, namely storage lipids (triacyl-glycerols, TAG) or membrane lipids (in  
86 chloroplasts mainly glyco-, phospho glycerolipids; and extraplastidic membranes,  
87 phosphoglycerolipids, sphingolipids, and sterol lipids) it is necessary that fatty acid synthe-

88 sis in plastids provides acyl-chains for subsequent steps located in both, the plastid and  
89 the ER (Rawsthorne, 2002; Li-Beisson et al., 2010). Accordingly, the subsequent lipid  
90 biosynthesis takes either place via the plastid located “prokaryotic pathway” or via the ER  
91 located “eukaryotic pathway” (Roughan and Slack, 1982).

92 While TAG is synthesized in the ER, the biosynthesis of membrane lipid occurs in both  
93 organelles the ER and in plastids (Li-Beisson et al., 2013). During membrane lipid  
94 synthesis, the usage of fatty acids in chloroplasts or alternatively in the ER leads to  
95 different types of structural lipids. Generally, plastids represent the major site for  
96 phosphatidyl-glycerol (PG) synthesis and the exclusive site for mono- and digalactosyl-  
97 diacylglycerol (MGDG and DGDG) biosynthesis, as well as for sulfoquinovosyl-  
98 diacylglycerol (SQDG) assembly. The ER and plastids are responsible for the provision of  
99 diacyl-glycerol (DAG) backbones which serve as a precursor for all ER-borne  
100 phospholipids, including phosphatidylcholine (PC) and phosphatidylethanolamine (PE)  
101 (Hagio et al., 2002; Andersson and Dörmann, 2009; Li-Beisson et al., 2010; Lavell and  
102 Benning, 2019). (Hagio et al., 2002; Andersson and Dörmann, 2009; Li-Beisson et al.,  
103 2010; Lavell and Benning, 2019). DAG synthesis in chloroplasts is particularly pronounced  
104 under cold conditions because the Sensitive to Freezing2 (SFR2) enzyme transfers  
105 galactosyl groups from MGDG to other galactolipids, resulting in the formation of  
106 oligogalactolipids (Moellering et al., 2010; Barnes et al., 2016). Besides the plastid-  
107 produced DAG, the ER-derived DAG moieties also act - after import into plastids - as  
108 precursors for plastid lipid biosynthesis (Li-Beisson et al., 2010).

109 Each membrane type is defined by a characteristic lipid composition. This composition is  
110 dynamic in response to changing environmental conditions with individual lipid mixtures  
111 giving rise to specific membrane properties (van Meer et al., 2008; Li-Beisson et al., 2010;  
112 Moellering et al., 2010). For example, at low temperatures, lipid remodeling maintains  
113 membrane fluidity to prevent ion leakage, to keep carrier and receptor proteins functional  
114 or to integrate novel protective proteins (Steponkus et al., 1977; Barrero-Sicilia et al.,  
115 2017). Accordingly, plant mutants exhibiting altered activities of (i) selected fatty acid  
116 biosynthesis enzymes, of (ii) fatty acid desaturases, of (iii) lipid transfer proteins or of (iv)  
117 lipases might exhibit modified cold tolerance and photosynthesis properties (Miquel et al.,  
118 1993; Welti et al., 2002; Khodakovskaya et al., 2006; Guo et al., 2013; Gao et al., 2020;

119 Schwenkert et al., 2023). The latter studies emphasize the impact of a proper membrane  
120 lipid remodeling after the onset of low temperatures. In fact, it has been shown for various  
121 species that low environmental temperatures lead to an upregulation of the chloroplast  
122 located lipid biosynthesis pathway (Li et al., 2015). Although several proteins involved in  
123 this process have been identified, the precise regulation responsible for this metabolic  
124 shift is still unknown.

125 In contrast to chloroplasts, which are the site of fatty acid *de novo* synthesis in the cell (Li-  
126 Beisson et al., 2010), the lipid biosynthesis pathway localized in the ER depends on import  
127 of fatty acids from plastids. The molecular nature of transport proteins mediating export of  
128 newly synthesized fatty acids from plastids had remained unknown for a long time (Wang  
129 and Benning, 2012). However, with the identification of the protein Fatty Acid Export  
130 Protein1 (FAX1) a first candidate was identified (Li et al., 2015) and the ability of FAX1 to  
131 promote shuttling of fatty acids across membranes has been shown in recombinant  
132 baker's yeast cells (Li et al., 2015). Furthermore, the absence of FAX1, which resides in  
133 the plastid inner envelope membrane, leads apart from male sterility (Li et al., 2015; Zhu  
134 et al., 2020) to decreased levels of ER-derived eukaryotic lipids, while the relative content  
135 of PG, synthesized via the prokaryotic pathway, was increased. In contrast, FAX1  
136 overexpressor lines exhibit an increased level of lipids assembled via the eukaryotic  
137 pathway, e.g., more TAG (Li et al., 2015).

138 The chloroplast serves as a cellular hub coordinating genetic and molecular responses  
139 required to acclimate to altered environmental conditions (Schwenkert et al., 2022). Thus,  
140 all signals and each metabolite emitted from- or received by the chloroplast must pass the  
141 inner-envelope membrane. Therefore, the inner-envelope proteome undergoes profound  
142 changes in response to the onset of stress conditions (Nishimura et al., 2016; Pottosin  
143 and Shabala, 2016; Wagner et al., 2016). Strikingly, FAX1 belongs to a group of inner  
144 envelope proteins which exhibit a proteolytic degradation after exposure to low  
145 temperatures, while other inner envelope proteins increase in their abundance  
146 (Trentmann et al., 2020). The mechanism responsible for the decrease of FAX1 in  
147 response to cold temperatures is elusive. In addition, it is unknown whether this  
148 phenomenon represents an important molecular process required for a maximal tolerance  
149 against low temperatures and/or frost.

150 Chloroplasts contain more than 2000 different soluble- or membrane bound proteins  
151 (Abdallah et al., 2000) and more than 20 different proteases ensure proteome homeo-  
152 stasis within the organelle (Nishimura et al., 2016). So far, two major classes of proteases  
153 have been identified to cleave intrinsic inner-envelope proteins, the metallo-dependent  
154 AAA type FtsH proteases (with the isoforms FtsH 7, 9, 11 and 12) and the rhomboid-like  
155 (RBL) proteases (with the isoforms RBL 10 and 11) (Knopf et al., 2012; Wagner et al.,  
156 2016; Adam et al., 2019).

157 Thus, the function of FAX1 and the pronounced impact of lipid remodeling on plant  
158 acclimation to cold raise two timely questions: First, what is the mechanism responsible  
159 for the rapid decline of FAX1 upon onset of cold? Second, is the cold-induced  
160 downregulation of FAX1 a pleiotropic response or is it important for low temperature  
161 tolerance? To answer both questions, we searched for an interaction of a selective  
162 protease with FAX1. It turned out, that FAX1 and RBL11 can physically interact, and that  
163 this protease is responsible for the cold-induced downregulation of FAX1. In addition, we  
164 have shown that under cold conditions, *rb11* mutants exhibit physiological and molecular  
165 phenotypes similar to FAX1 overexpressors. Furthermore, we show that a lack of FAX1  
166 degradation in response to cold impairs the ability of Arabidopsis plants to cope with low  
167 temperature and freezing. These findings contribute to our understanding of how plants  
168 tolerate adverse environmental conditions, one of the most impressive traits required to  
169 ensure plant productivity.

170

## 171 **Results**

### 172 **Transcript abundance of the plastid protease *RBL11* responds to cold treatments**

173 It was previously shown that the protein Fatty Acid Export Protein1 belongs to a small  
174 group of inner envelope proteins which are downregulated in their abundance upon onset  
175 of cold temperatures (Trentmann et al., 2020). While FtsH12 is critical for chloroplast  
176 development (Mielke et al., 2020), FtsH11 and RBL10 activity affect either, the  
177 temperature response or the membrane lipid composition, respectively (Chen et al., 2006;  
178 Wagner et al., 2011; Lavell et al., 2019). Thus, in addition to FtsH11 and RBL10, we  
179 initially focused on RBL11 (the besides RBL10 only other rhomboid-like protease at the  
180 inner envelope) which was shown to be active in fully developed mesophyll chloroplasts  
181 (Knopf et al., 2012).

182 To gain first insight into possible molecular interactions between the proteases and FAX1  
183 we analyzed the transcription level of corresponding genes after transfer to 4°C (Figure  
184 1A), the standard temperature in our laboratory to study cold effects (Patzke et al., 2019;  
185 Cvetkovic et al., 2021). Initially, transcript levels of all three envelope proteases  
186 accumulated in response to the shift towards cold growth conditions. After one week at  
187 4°C the most pronounced *RBL11* mRNA change was detected, which had about 14-fold  
188 higher abundance when compared to the beginning of this treatment (Figure 1A). Both,  
189 *RBL10* and *FTSH11* mRNA amounts peaked at 4- or 7 times higher levels respectively,  
190 after 7 days of cold treatment versus the start of the cold period (Figure 1A). The highest  
191 levels of all three mRNAs were present after 14 days in cold conditions and from then on,  
192 these three transcript levels declined in their abundance (Figure 1A).

### 193 194 ***rbl11* mutants exhibit impaired growth at cold temperature since RBL11 controls** 195 **FAX1 abundance in the cold**

196 To search for specific responses in mutants lacking one of the three proteases, we grew  
197 wild-type and respective loss-of-function lines under either, control conditions (21°C), or  
198 for 7 or 56 days at 4°C.



199 When grown at 21°C, none of the mutants exhibited a phenotypic pattern distinct from  
200 wild-type plants (Figure 1B). When grown at 4°C for 7 days all genotypes showed slightly  
201 decreased chlorophyll levels, as indicated by brighter leaves (Figure 1B). However, after  
202 56 days at 4°C all mutant plants exhibited impaired growth, i.e., smaller rosette sizes when  
203 compared to the wild type (Figure 1B). We previously showed that plants with impaired  
204 tolerance against cold temperatures exhibited increased numbers of wilted leaves when  
205 exposed to 4°C (Trentmann et al., 2020). Interestingly, after 56 days at 4°C, *rb11* mutants  
206 exhibited wilted leaves (Figure 1B). This effect was further exacerbated in *rb11* plants  
207 after ten weeks at 4°C (Figure 1C, pictures from top and bottom of the rosette). A  
208 quantification of this observation showed that after ten weeks at 4°C, wild types exhibited  
209 1.25 wilted leaves/plant, while *rb11* mutants displayed in five wilted leaves per plant on  
210 average (Figure 1D).

211 The observation that from all three proteases tested, the *RBL11* mRNA is the fastest  
212 responding transcript within 7 days after transfer to 4°C (Figure 1A), rendered the  
213 corresponding enzyme a prime candidate for cold-induced FAX1 degradation. To test the  
214 effect of RBL11 on FAX1 levels, we isolated chloroplast envelopes from wild types and  
215 *rb11* loss-of-function mutant plants and conducted immunoblots using a previously  
216 established FAX1 antibody (Li et al., 2015). The parallel immunoblotting of the inner  
217 envelope protein TIC110 (Balsera et al., 2009) confirmed similar levels of total envelope  
218 proteins in each lane (Figure 1E). Interestingly, already in *rb11* mutants grown at control  
219 temperature the FAX1 protein appeared increased by about 50% when compared to wild  
220 type plants (Figure 1E). After 7 days in cold conditions, the FAX1 protein in wild type plants  
221 decreased markedly (Figure 1E), which confirms our previous observations (Trentmann  
222 et al., 2020). Such cold-induced FAX1 degradation was almost absent in *rb11* mutants  
223 compared to wild-type controls, while cold-induced FAX1 degradation occurred similarly  
224 in *rb10* and *ftsh11* mutants (Figure 1E).

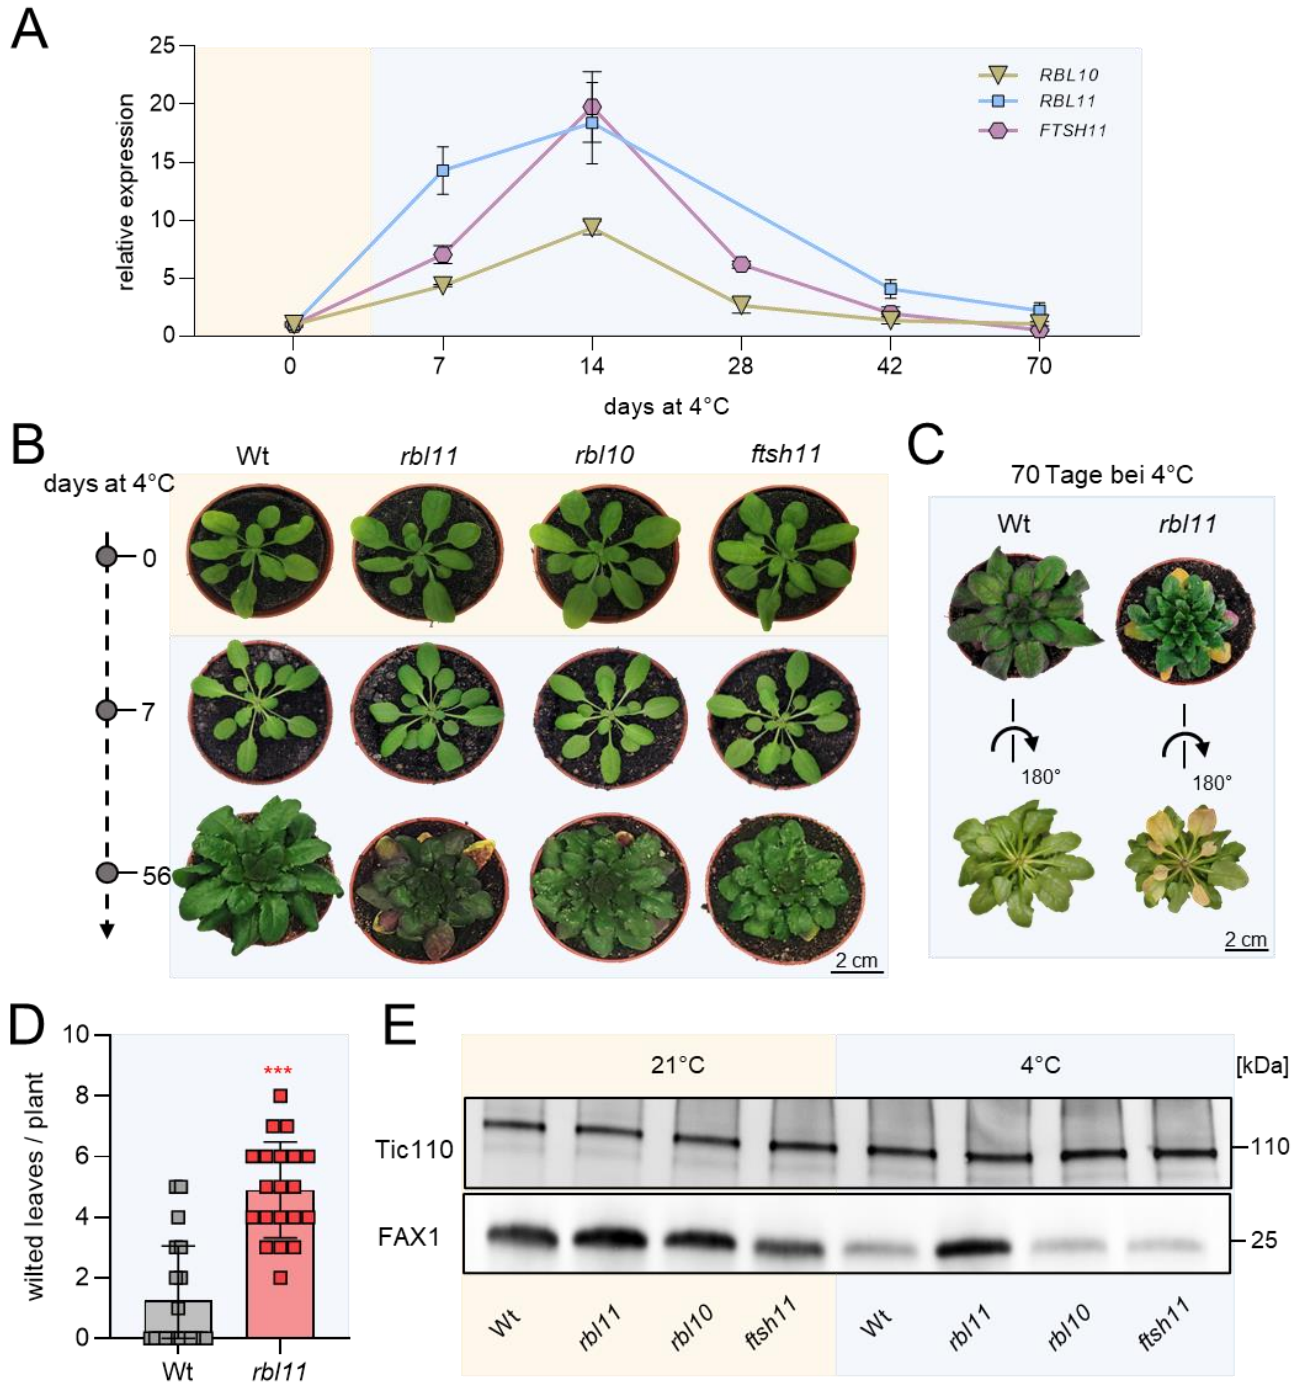

225  
226 **Figure 1:** Gene expression, phenotypic and immunoblot analysis of Arabidopsis protease loss-of-  
227 mutants *rbl11*, *rbl10* and *ftsh11* grown under standard and cold (4°C) conditions. Plants  
228 were grown under standard conditions (21°C day and night temperature, 10h day length and  
229 120μE light intensity) for 3 weeks and then treated with cold (4°C day and night temperature, 10h  
230 day length and 120μE light intensity). A) Gene expression levels of *RBL11*, *FTSH11* and *RBL10*  
231 in wild type by qRT-PCR under standard growth conditions (0 days at 4°C) and several days  
232 during cold treatment (7; 14; 28; 42, and 70 days at 4°C). Data represent relative mean expression  
233 levels of 3 biological replicates and are normalised to standard conditions (0 days at 4°C) using

234 UBG as an internal control. B) Phenotypic analysis of *rb111*, *rb110* and *ftsh11* Arabidopsis plants.  
235 Images were taken from plants grown under standard conditions and after chilling for 7 and 56  
236 days. C) Wt and *rb111* rosettes were cut after 70 days of cold treatment and rotated to highlight  
237 the wilted leaves. D) Number of wilted leaves per plant in Wt and *rb111* after 70 days of cold  
238 treatment. E) Immunoblot analysis via FAX1 antibody in isolated chloroplast envelopes of Wt,  
239 *rb111*, *rb110* and *ftsh11* from plants grown under standard conditions (21°C) and plants grown for  
240 7 days at 4°C. Immunoblot detection via Tic110 antibody is used as a control and shows an equal  
241 loading of the protein samples at 3 µg per lane. Error bars in A) represent ± SEM. Error bars in D)  
242 are ± SD. Asterisks indicate significant differences between Wt and mutant using a t-test: p-value  
243 ≤0.001: \*\*\* (Supplemental file 1).

244

### 245 ***rb111* mutants exhibit impaired frost tolerance**

246 The observation that *rb111* plants show an increased number of wilted leaves when grown  
247 at cold temperatures (Figure 1B-D) led us to test the freezing tolerance of this mutant. The  
248 ability of vascular plants to withstand freezing temperatures depends on a pretreatment  
249 of several days at temperatures above 0°C, called cold acclimation (Alberdi and Corcuera,  
250 1991). To investigate whether the altered cold response in mutants affects freezing  
251 tolerance, we compared the ability of wild-types and *rb111* plants to recover from exposure  
252 to freezing temperatures. To this end, plants were grown at 21°C and shifted to 4°C for  
253 four days to acclimate the cold. The temperature was then gradually reduced (2°C/h) until  
254 -10°C was reached. This temperature was maintained for 15h and then gradually  
255 increased (2°C/h) to 21°C before re-lighting (Trentmann et al., 2020). We assessed the  
256 phenotypic appearance of frost-treated plants after one and two additional weeks of  
257 growth at 21°C and quantified the number of wilted leaves as well as the survival rate after  
258 two weeks recovery phase.

259 As expected, unacclimated wild types and *rb111* plants are unable to survive a freezing  
260 treatment (Figure 2A). As seen previously (Trentmann et al., 2020), wild-type plants are  
261 able to recover from a period of freezing with an efficiency of about 80% (Figure 2A,B)  
262 and exhibited 42% wilted leaves (Figure 2C). In contrast, *rb111* mutants showed a  
263 significantly reduced ability to recover from freezing treatment, as only 28% of all plants  
264 survived the freezing period and more than 60% of the leaves were wilted (Figure 2A-C).

265

266

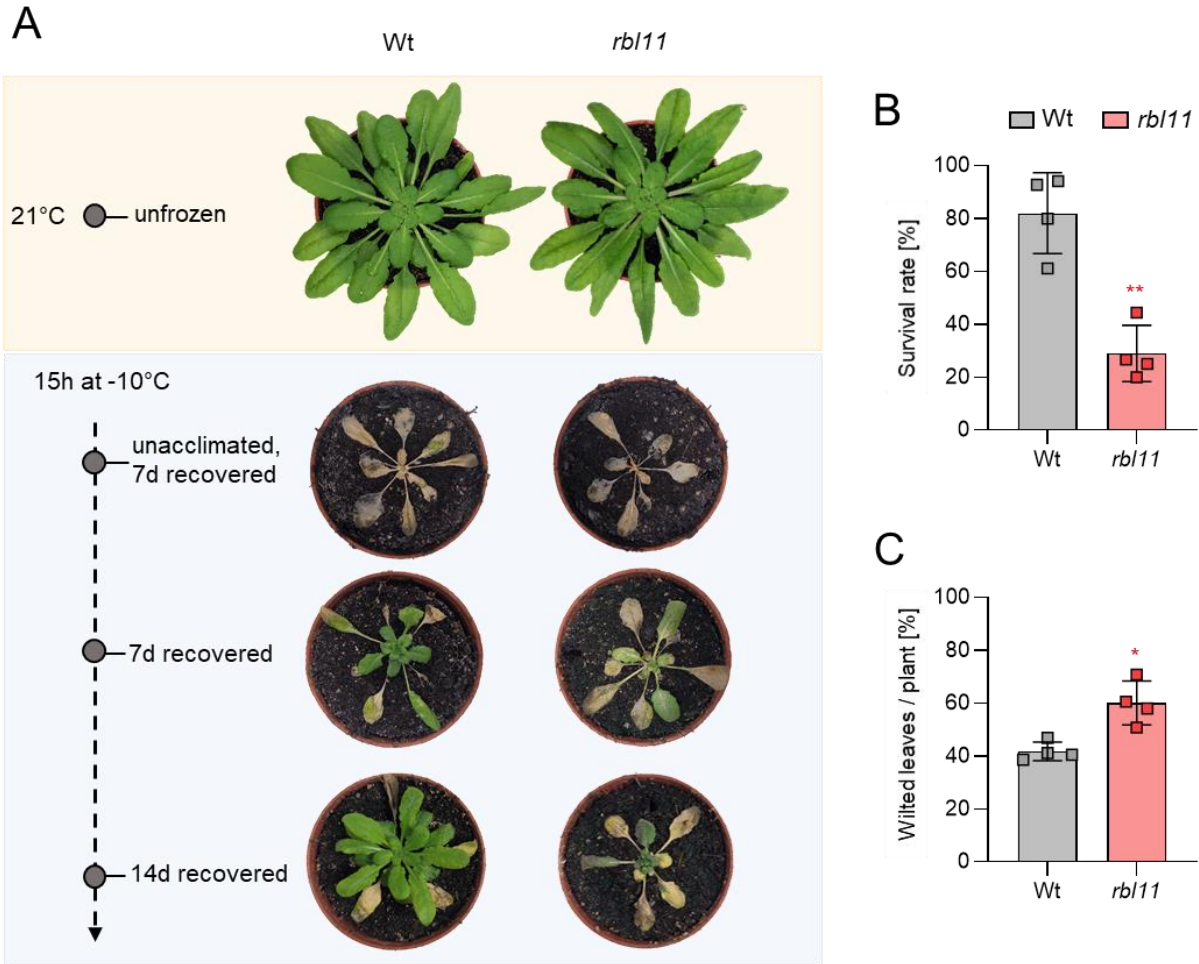

267

268 **Figure 2:** Recovery from freezing is impaired in *rbl11* loss-of-function mutants. Plants were grown  
269 under standard growth conditions for 3 weeks. Prior to freezing, the temperature was lowered to  
270 4°C for 4 days (day and night temperature) for cold acclimation. The lowering of the temperature  
271 for freezing was done stepwise (2°C/h) and in complete darkness. The temperature for freezing  
272 was maintained at -10°C for 15 h before being gradually increased to 21°C (2°C/h). A)  
273 Representative Wt and *rbl11* plants recovered from -10°C freezing. Images were taken 7 and 14  
274 days after freezing, from unacclimated and unfrozen (control) plants. B) Comparison of survival  
275 between Wt and *rbl11* mutants 7 days after -10°C treatment. Data represent the mean of four  
276 independent experiments with 10 to 20 plants per line and experiment. C) Quantification of wilted  
277 leaves from Wt and *rbl11* plants recovered from -10°C freezing for 7 days under standard growth  
278 conditions. Data are the mean of 4 independent experiments. Statistical differences between wild-  
279 type and overexpressor lines in B) and C) were analysed by Student's t-test followed by Welch's  
280 correction: p-value ≤0.05: \*; p-value ≤0.01: \*\* (Supplemental file 1).  
281

281

282 **RBL11 and FAX1 interact physically at the inner envelope membrane of chloro-**  
283 **plasts**

284 Having established that RBL11 activity is mandatory for cold-induced FAX1 degradation  
285 (Figure 1E), we were next interested to probe for a direct physical interaction between  
286 these two proteins. To this end, we exploited the Bimolecular Fluorescence  
287 Complementation (BiFC) analysis (Kerppola, 2008) based on the association of  
288 complementary yellow fluorescent protein (YFP) fragments fused to putative partner  
289 proteins. Only when both partners are in close proximity, a functional fluorescent protein  
290 can be formed, indicating the protein-protein interaction and its subcellular location within  
291 the living cell.

292 We infiltrated *Nicotiana benthamiana* leaves with the constructs FAX1:YFP<sup>C-n</sup> and  
293 RBL11:YFP<sup>C-c</sup> for synthesis of the respective YFP fragment proteins. Co-expression of both  
294 constructs resulted in yellow fluorescing spots in epidermis cells (Figure 3A), indicating  
295 that both proteins interact in corresponding plastids. To further visualize the complex  
296 formation of both proteins at the chloroplast envelope, we infiltrated *N. benthamiana*  
297 leaves with both constructs and subsequently isolated mesophyll protoplasts. The  
298 combined expression of FAX1:YFP<sup>C-n</sup> and RBL11:YFP<sup>C-c</sup> led to a yellow fluorescence of  
299 chloroplasts (Figure 3B). The ring-shaped fluorescence (Figure 3B) resembles the YFP  
300 fluorescence emitted by other inner envelope associated YFP fusion proteins (Witz et al.,  
301 2014; Patzke et al., 2019). To validate the BiFC data we performed further control  
302 experiments using inner envelope associated protease FtsH11. In contrast to the co-  
303 expression of FAX1:YFP<sup>C-n</sup> and RBL11:YFP<sup>C-c</sup>, the infiltration of the plasmids with  
304 FAX1:YFP<sup>C-n</sup> and FTSH11:YFP<sup>C-c</sup> did not yield fluorescence complementation (Figure  
305 3C,D). In addition, the combined infiltration of the constructs FTSH11:YFP<sup>C-n</sup> and  
306 RBL11:YFP<sup>C-c</sup> also did not give rise to a fluorescence signal (Figure 3E,F). These two  
307 independent control experiments indicate that protein-protein interaction at the inner  
308 envelope does not occur by chance, highlighting the specificity of the RBL11 and FAX1  
309 interaction (Figure 3A,B).



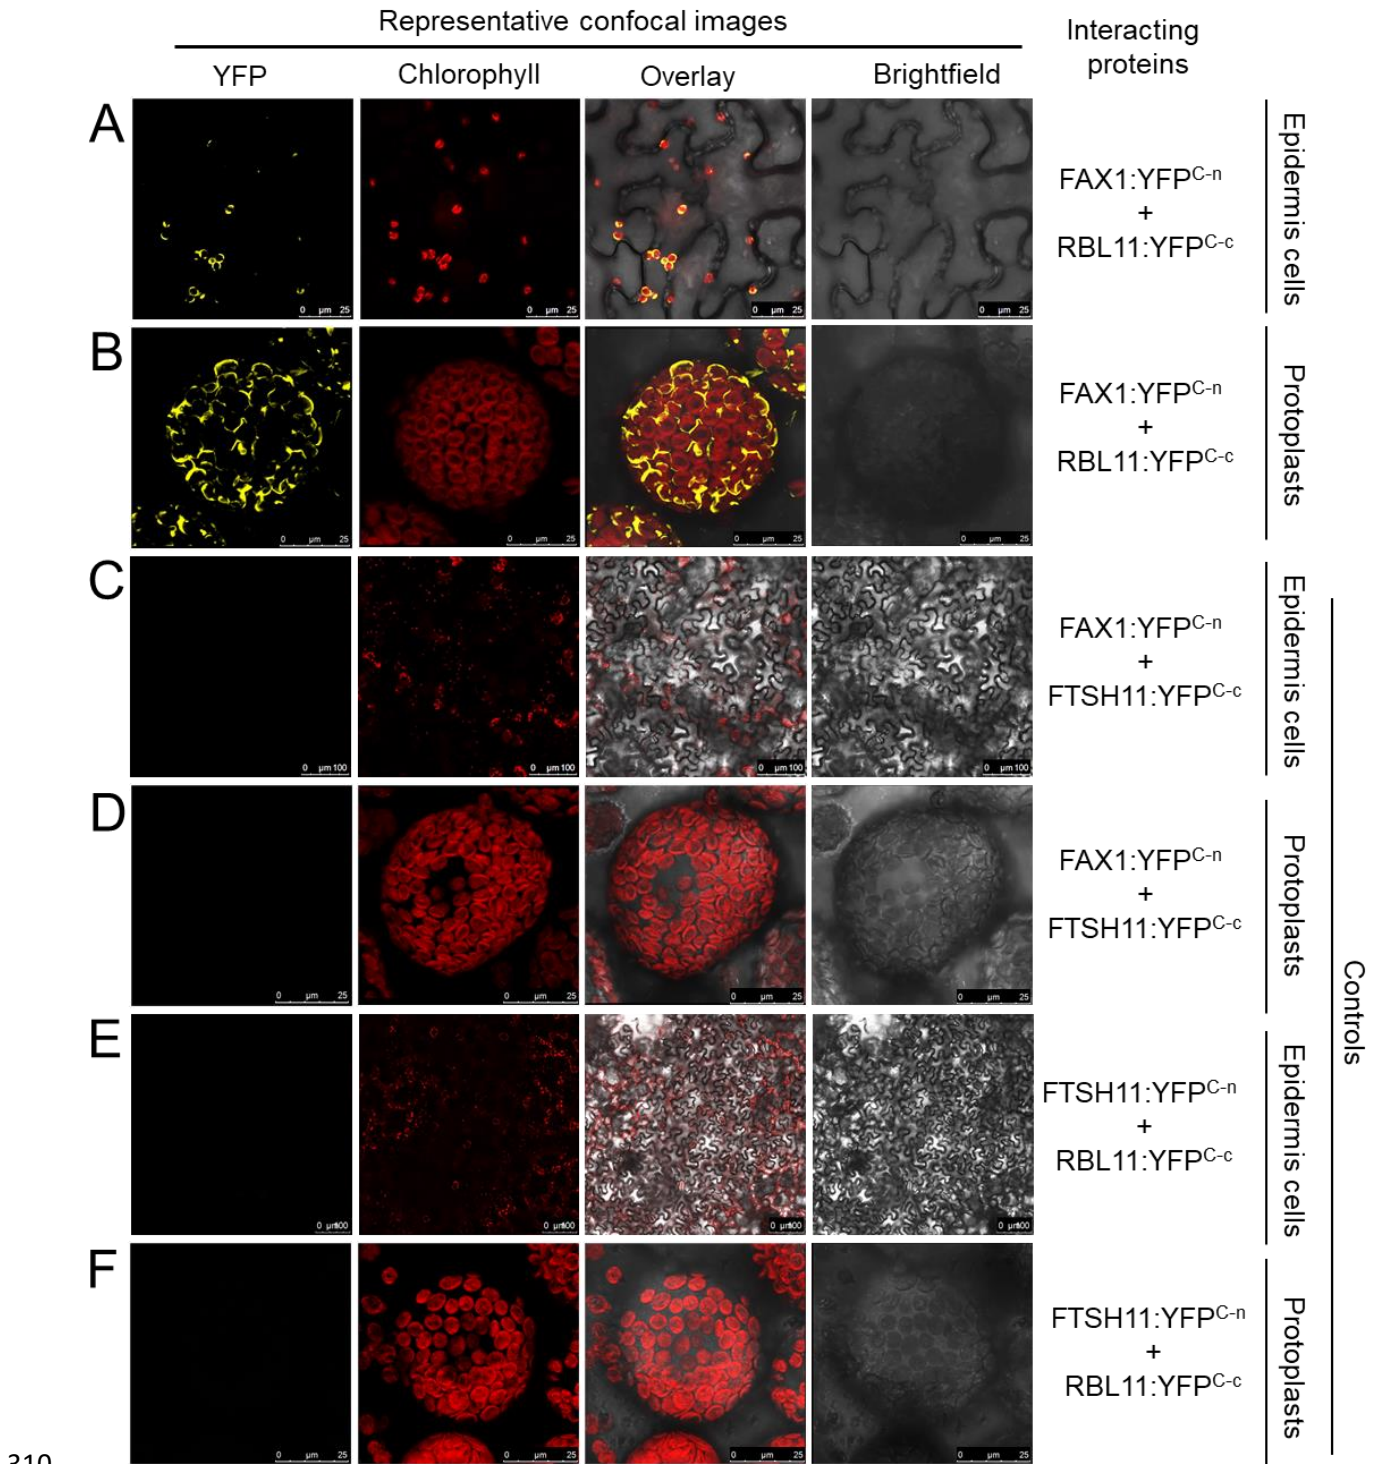

310

311 **Figure 3:** Probing of putative RBL11 targets. Constructs of full-length coding sequences were  
 312 fused upstream to the C-terminus of yellow fluorescent protein (YFP) and transiently expressed  
 313 in *Nicotiana benthamiana* leaves by agroinfiltration. YFP and chlorophyll fluorescence signals  
 314 were recorded 4 days after infiltration in epidermis cells as well as in isolated protoplasts by  
 315 confocal microscopy.

316

317 **Induction of *RBL11* leads to a specific degradation of FAX1**

318 In contrast to wild types, *rb11* plants are almost unable to degrade FAX1 after the onset  
319 of cold (Figure 1E). To further support our hypothesis that RBL11 is responsible for cold-  
320 induced FAX1 degradation, we generated a stable RBL11-HA (HA = hemagglutinin) over-  
321 expressor line in which the recombinant *rb11* gene was placed under the control of a  
322 dexamethasone (DEX)-inducible promoter (Aoyama and Chua, 1997) (Figure 4A). In the  
323 presence of DEX, the RBL11-HA protein is synthesized in mutant leaf discs at 21°C and  
324 at 4°C (Figure 4B,C), and neither DEX-induced overexpression nor the C-terminal HA tag  
325 alters the membrane localization of RBL11 (Figure 4B,C). Subsequent enrichment of total  
326 leaf membranes, followed by immunoblot analysis using the FAX1-specific antibody,  
327 showed that RBL11 overexpression does not lead to FAX1 degradation from leaf discs  
328 incubated with DEX at 22°C (Figure 4D), which might be due to some post-translational  
329 modification required for FAX1 activity. In contrast, DEX incubation at 4°C leads to FAX1  
330 degradation (Figure 4D, note that extraction of total membrane proteins from whole  
331 membranes enriched from cold treated leaf discs generally resulted in a higher abundance  
332 of FAX1 (Figure 4D, left and right panels).

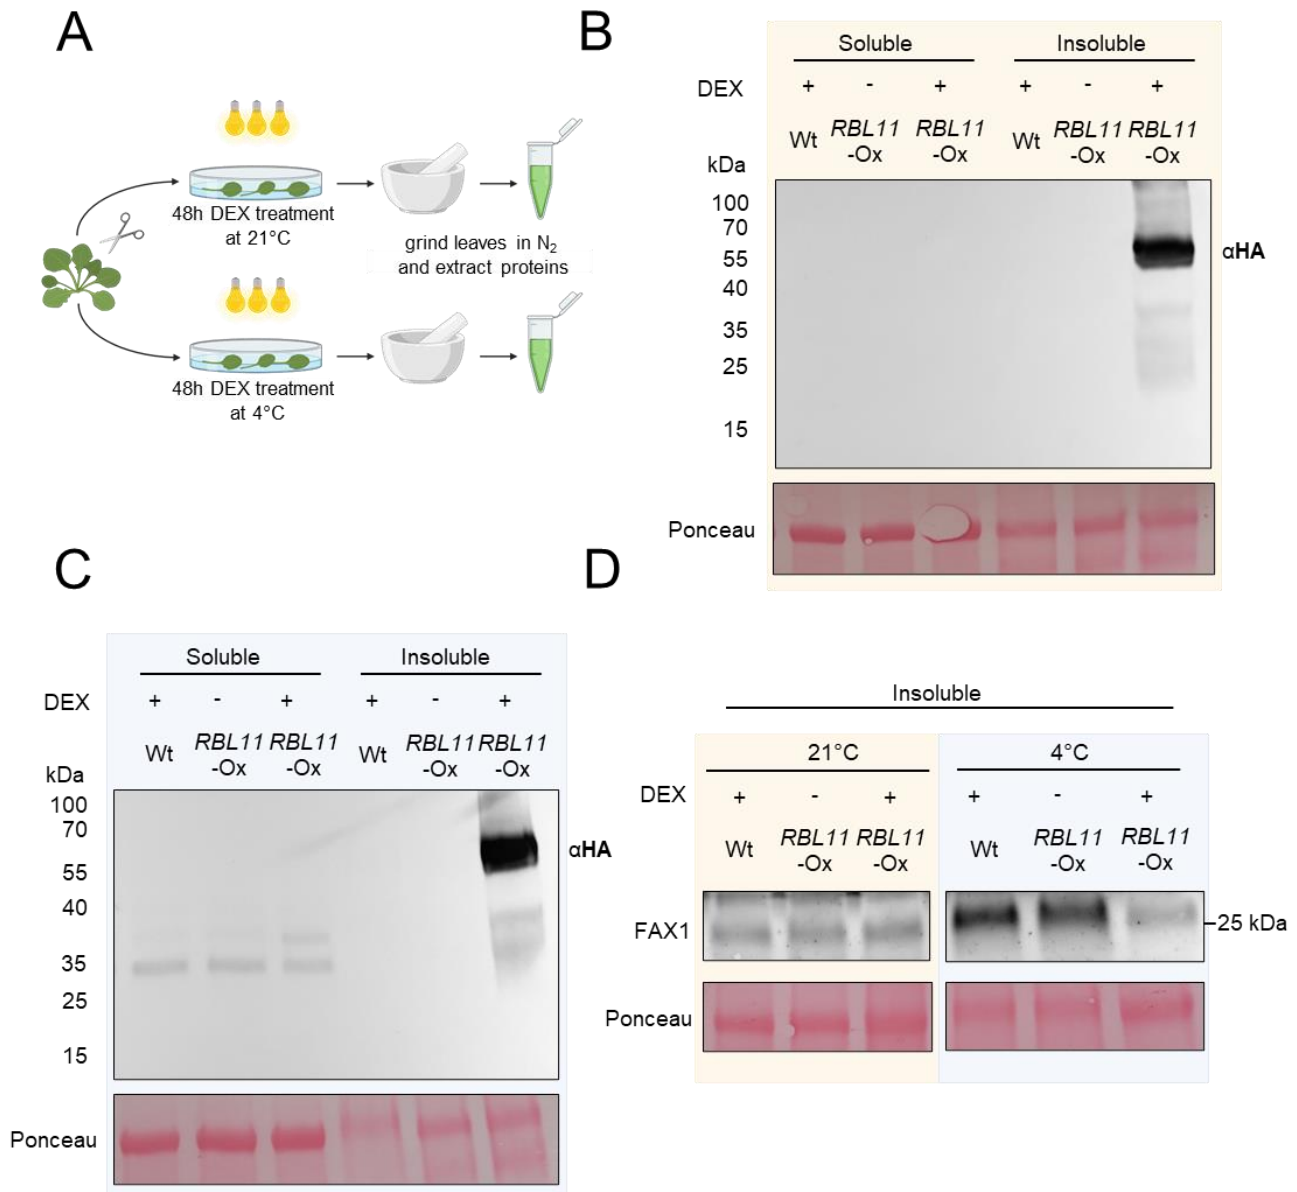

333

334 **Figure 4: Cold induced degradation of FAX1 by RBL11 in Arabidopsis.** A) Scheme of  
 335 experimental setup. B) Immunoblot analysis via HA antibody of soluble and insoluble (membrane)  
 336 protein extracts from wildtype and transgenic plants expressing RBL11 tagged with a HA epitope  
 337 (~ 32 kDa) under the control of an 35S promotor after induction with dexamethasone for 48h at  
 338 21°C. C) Immunoblot detection via HA antibody of soluble and insoluble (membrane) protein  
 339 extracts from wildtype and transgenic plants expressing RBL11 tagged with a HA epitope (~ 67  
 340 kDa) under the control of an 35S promotor after induction with dexamethasone for 48h at 4°C.  
 341 Note that the size of the protein (~ 67 kDa) comes from the presence of an additional biotinylase  
 342 (~35 kDa), which was not relevant in this experiment. D) Immunoblot of insoluble protein extracts  
 343 from Wt and and transgenic plants overexpressing *RBL11* under the control of an 35S promotor  
 344 after induction with DEX for 48h at 21°C or 4°C with a FAX1 antibody. Please note that the  
 345 extraction of whole membranes enriched from cold treated leaves generally resulted in a higher  
 346 abundance of FAX1 and is not comparable with results from leaves treated at 21°C. Ponceau  
 347 staining in B), C) and D) is representing equal loading of protein samples with 18 µg per lane.



348 **The membrane lipid composition of *rb11* mutants indicates a shift to the eukaryotic**  
349 **biosynthesis pathway under low temperature**

350 The abundance of FAX1 strongly decreases after transfer of wild type to cold conditions  
351 (Figure 1E and Trentmann et al. 2020). Because the absence of RBL11 prevents cold-  
352 induced FAX1 degradation (Figure 1E) we aimed to determine changes in lipid levels  
353 under these growth conditions. For this purpose, wild-type and *rb11* mutant plants were  
354 first grown for 4 weeks under control conditions and then either, for further 14 days at  
355 21°C or at 4°C, prior to extraction and quantification of leaf lipids.

356 Growth of plants at 21°C led to lower leaf levels of the major glycolipids monogalactosyl-  
357 diacylglycerol (MGDG) and digalactosyl-diacylglycerol (DGDG) in *rb11* plants compared  
358 to wild types (Figure 5). In contrast, the levels of sulfoquinovosyl-diacylglycerol (SQDG)  
359 and the phospholipids phosphatidic acid (PA), phosphatidylserine (PS), phosphati-  
360 dylinositol (PI), phosphatidylglycerol (PG), phosphatidylethanolamine (PE) and phospho-  
361 tidylcholine (PC) were similar in leaves from the two plant lines (Figure 5). These absolute  
362 amounts summed up to 230 nmol mg<sup>-1</sup> DW of phospho- and glycolipids in *rb11* mutants  
363 and 274 nmol mg<sup>-1</sup> DW of phospho- and glycolipids in wild-type plants (Figure 5A, inset).  
364 However, after recalculating the data from total levels into mol% no obvious changes in  
365 the relative individual lipid species between *rb11* mutant and wild type plants were found  
366 (Figure 5B). Interestingly, growth for 14 days under cold temperature conditions led to  
367 higher total lipid levels in the *rb11* plants (Figure 5C inset). This increase of total lipids in  
368 the *rb11* mutants is due to higher levels of MGDG, DGDG and SQDG, but also to higher  
369 levels of all phospholipids (Figure 5C). Furthermore, after recalculating the data into mol%  
370 it appeared that growth at 4°C did not only lead to higher total lipid contents in *rb11* plants,  
371 but that especially the relative proportions (in mol%) of the phospholipid species PA, PI,  
372 PE and PC to the total lipids was increased in the *rb11* plants, while proportions of MGDG  
373 and DGDG are decreased (Figure 5D).

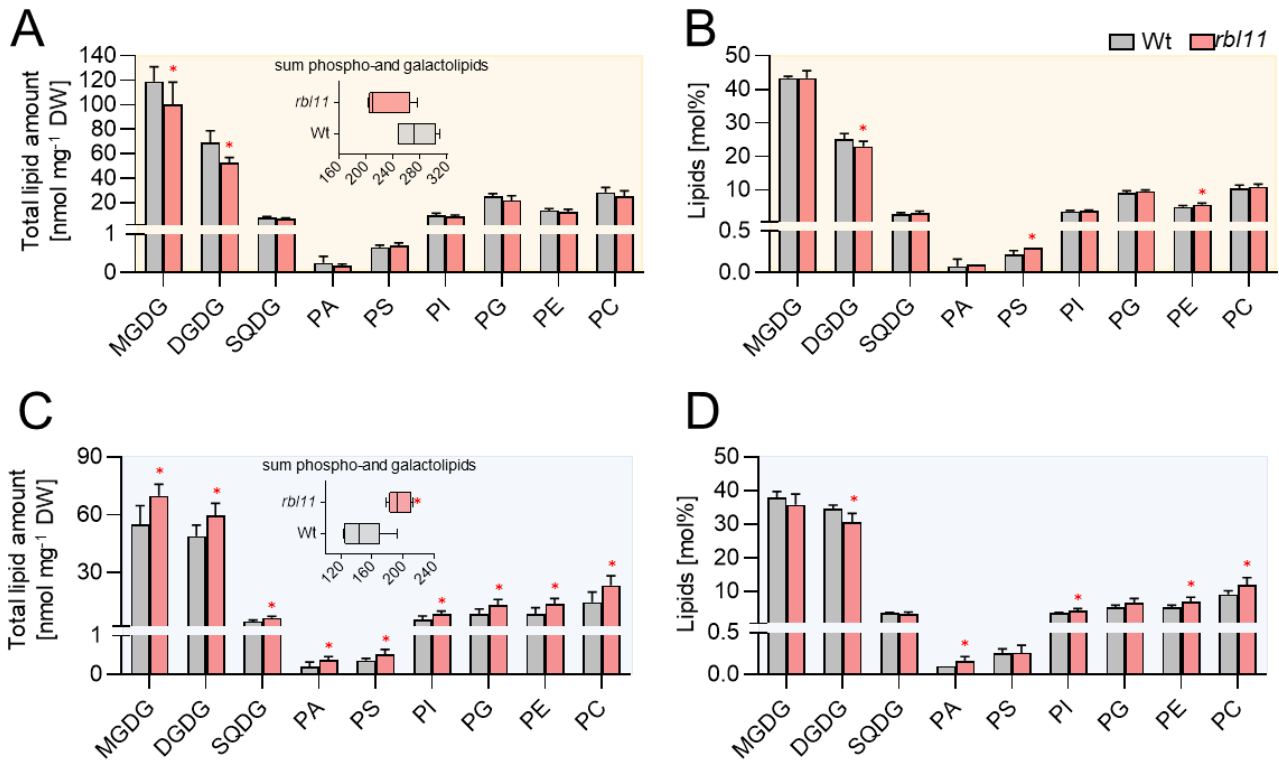

374

375 **Figure 5.** Analysis of galacto- and phospholipids in Wt and *rbl11* loss-of-function mutants.  
 376 Changes in A) total contents and B) relative amounts of different galacto- and phospholipids in  
 377 rosette leaves of 3-week-old Arabidopsis plants grown under standard conditions. The box plot in  
 378 A) shows changes in the sum of the measured total lipid contents. Differences in C) total lipid  
 379 contents and D) relative galacto- and phospholipid amounts in plants grown under standard  
 380 conditions for 3 weeks before lowering the temperature to 4°C for 14 days. The box plot in C)  
 381 shows the changes in the sum of the measured total lipid contents. Data represent the mean of 5  
 382 plants per row. Error bars indicate  $\pm$  SD. Significance of differences between wild-type and mutant  
 383 was analysed by Student's t-test: p-value  $\leq 0.05$ :\* (Supplemental file 1).

384

### 385 Identification of other putative RBL11 protease substrates

386 By analyzing the envelope proteome of *rbl10rbl11* double mutants an overrepresentation  
 387 of non-degraded envelope proteins compared to wild type emerged (Knopf et al., 2012).  
 388 However, this type of analysis did not allow for the identification of RBL11-specific  
 389 substrates. Thus, we compared the envelope proteome from wild type plants with that of  
 390 *rbl11* single mutants (Table 1, Suppl. Table 1, Suppl. Table 2, and Suppl. Table 3). Since  
 391 we were especially interested in RBL11 substrates degraded after onset of cold temper-  
 392 atures, these analyses were carried out on plants grown at 21°C or at 4°C (Table 1).

393

| Protein        | Gene locus | Description                                                                                                                                           | Log2FC<br><i>rbl11</i> / Wt | qValue_Interaction<br>Genotype Temperature |
|----------------|------------|-------------------------------------------------------------------------------------------------------------------------------------------------------|-----------------------------|--------------------------------------------|
| <b>TGD5</b>    | At1g27695  | Encodes a small glycine rich protein that is localized to the chloroplast envelope and is a component of the ER to plastid lipid trafficking pathway. | 4.54                        | 0.033                                      |
| <b>PORA</b>    | At5g54190  | light-dependent NADPH:protochlorophyllide oxidoreductase A                                                                                            | 4.08                        | 0.030                                      |
| HCF107         | At3g17040  | Involved in regulating plastidial gene expression and biogenesis                                                                                      | 1.56                        | 0.002                                      |
| <b>unknown</b> | At3g28220  | TRAF-like family protein, contains MATH domain                                                                                                        | 2.73                        | 0.044                                      |
| KIN14A         | At5g10470  | Kinesin-like protein required for chloroplast movements and anchor to the plasma membrane                                                             | 2.18                        | 0.032                                      |
| <b>DVR</b>     | At5g18660  | Encodes a protein with 3,8-divinyl protochlorophyllide a 8-vinyl reductase activity                                                                   | 1.85                        | 0.031                                      |
| <b>unknown</b> | At1g08530  | Chitinase-like protein                                                                                                                                | 1.35                        | 0.019                                      |
| unknown        | At5g19850  | Alpha/beta-Hydrolases superfamily protein                                                                                                             | 1.47                        | 0.027                                      |
| <b>unknown</b> | At1g64850  | Calcium-binding EF hand family protein                                                                                                                | 1.22                        | 0.015                                      |
| unknown        | At5g39410  | Saccharopine dehydrogenase                                                                                                                            | 1.06                        | 0.018                                      |
| unknown        | At2g43630  | Nucleus envelope protein                                                                                                                              | 0.48                        | 0.004                                      |
| TGD2           | At3g20320  | Encodes a permease-like component of an ABC transporter involved in lipid transfer from ER to chloroplast. A phosphatidic acid-binding protein.       | 0.98                        | 0.022                                      |
| DEGP2          | At2g47940  | Encodes DegP2 protease                                                                                                                                | 0.83                        | 0.015                                      |
| SPPA           | At1g73990  | Encodes a light-inducible chloroplast protease complex                                                                                                | 0.78                        | 0.015                                      |
| FAX1*          | At3g57280  | involved in fatty acid and lipid homeostasis and likely functions as a fatty acid transporter that exports fatty acids from the plastid               | 0.38                        | 0.028                                      |

394 Table 1. The table shows the 15 top hits of proteins that are increased by more than 30% in the mutant at low  
395 temperature. For each protein a two-way ANOVA was performed, which means that only proteins with a significance  
396 level below 0.05 were considered. The qValue\_Interaction Genotype Temperature indicates that there is a temperature  
397 effect that differs between mutant and wild type. All proteins were annotated by name, gene locus and description. The  
398 proteins written in bold and in italics are increased under standard conditions as well as after 7 days at 4°C (see Suppl.  
399 Table 1) to the described selected criteria (Abundance > 30%; qValue < 0.05). FAX1 was labeled with an asterisk  
400 because the protein is not within the top hits, but also fulfills the selected criteria.

401 Putative substrates of RBL11 are expected to be more abundant in *rb11* mutants when  
402 compared to wild-type plants. In a previous study on proteins accumulating in the inner  
403 envelope of *rb10rb11* double mutants, the TRAF-like family protein containing a MATH  
404 domain was also found to accumulate in the double mutant (Knopf et al., 2012). Similarly,  
405 the TRAF-like family protein accumulated in *rb11* single mutants (Suppl. Table 1)  
406 indicating that this protease is responsible for its degradation. Interestingly, the  
407 abundance of the protein TGD5, which is involved in ER to plastid lipid transfer (Fan et  
408 al., 2015), is also higher in *rb11* mutants than in wild types, and this effect is independent  
409 of the environmental temperature (Suppl. Table 1 and Table 1). Besides TGD5, the  
410 abundance of another TGD protein, namely TGD2, is also higher in *rb11* mutants when  
411 exposed for 4 days to 4°C (Table 1). In addition, the chloroplast located protease systems  
412 DegP2 and SPPA are also more abundant in cold treated *rb11* mutants when compared  
413 to wild type (Table 1). Similarly, the inner envelope associated NADPH:protochloro-  
414 phyllide reductase PORA (Barthélemy et al., 2000) appears, besides the TGD  
415 components and FAX1, as a further RBL11 substrate (Suppl. Table 1), especially after  
416 onset of cold temperature (Table 1). It seems likely that the decrease of some proteins in  
417 *rb11* chloroplasts under warm or cold conditions represents pleiotropic reactions of the  
418 mutant induced by altered FAX1 abundance (Suppl. Table 2 and Suppl. Table 3).  
419 Nevertheless, among these proteins, we also found proteins associated with lipid  
420 metabolism, e.g., LACS9, representing a major long chain acyl-CoA synthetase (Schnurr  
421 et al., 2002), or BASS1, representing a sodium/pyruvate cotransporter (Furumoto et al.,  
422 2011) (Suppl. Table 2 and Suppl. Table 3).

423

424 ***FAX1* overexpressor lines exhibit markedly increased levels of *FAX1* protein**

425 The above data indicate a molecular interrelation between increased *FAX1* protein abun-  
426 dance (due to an absence of *RBL11*) and the levels of membrane lipids and *Arabidopsis*  
427 cold tolerance (Figures 1 and 3). This encouraged us to analyze the impact of increased  
428 *FAX1* abundance on plant cold tolerance. *rb11* mutants are not conducive to this,  
429 because the absence of this protease does not exclusively affect *FAX1* levels, but also  
430 the abundance of other envelope associated proteins (Table 1). To avoid the study of  
431 pleiotropic effects, we decided to investigate the cold tolerance of *Arabidopsis* mutants  
432 with constitutively increased *FAX1* levels (Li et al., 2015).

433 Our observations that *rb11* loss-of-function mutants have increased *FAX1* levels under  
434 cold conditions (Figure 1E) and that directed synthesis of *RBL11* leads to a decrease in  
435 *FAX1* in the cold (Figure 2) provide evidence that the *RBL11* protease is responsible for  
436 this process. Nevertheless, for a comprehensive understanding of *FAX1*'s impact on the  
437 cold response, it is mandatory to study *FAX1* transcript levels after transfer to cold  
438 conditions. In fact, the observation that *FAX1* mRNA rises markedly in wild-type plants  
439 after exposure to 4°C (Figure 6A) supports our conclusion that *RBL11* is responsible for  
440 the cold-induced decrease of the level of the *FAX1* protein (Figure 1F).

441 Previously, we generated two independent *FAX1* overexpressing lines, *FAX1* Ox#2 and  
442 *FAX1* Ox#4, both containing the *FAX1* gene under the control of the constitutive  
443 cauliflower 35S promoter (Li et al., 2015). So far, it has only been shown that these mutant  
444 lines have both, increased *FAX1* mRNA and increased *FAX1* protein levels when grown  
445 at ambient temperature (Li et al., 2015). We verified that the *FAX1* mRNA accumulation  
446 is a stable feature when *FAX1* overexpressor mutants are cultivated at cold temperature.  
447 For this purpose, the *FAX1* mRNA levels were quantified in plants grown under the  
448 standard temperature of 21°C with those grown for one week at 4°C. The two *FAX1*  
449 overexpressor lines exhibited a substantial accumulation of *FAX1* mRNA when compared  
450 to wild-type plants. Under warm temperature, *FAX1* Ox#2 plants contained about 2.1-fold  
451 higher *FAX1* mRNA levels as present in the wild type, while *FAX1* Ox#4 plants contained  
452 even 1170-fold higher *FAX1* mRNA (Figure 6B). This marked difference of *FAX1* mRNA  
453 in the two overexpressors concurs with previous observations (Li et al., 2015). After one  
454 week of growth at 4°C, *FAX1* Ox#2 plants contained about 5.7-fold higher *FAX1* mRNA

455 levels, and FAX1 Ox#4 plants contained more than 970-fold higher *FAX1* mRNA levels  
456 than present in the wild type (Figure 6C). Thus, even at 4°C, both FAX1 overexpressor  
457 lines exhibited higher *FAX1* mRNA than present in the wild type.

458 It was shown that both FAX1 overexpressors contain higher levels of FAX1 protein when  
459 grown at 21°C (Li et al., 2015). To confirm that also under cold conditions, FAX1  
460 overexpressor lines exhibit higher FAX1 protein levels than present in wild types, we  
461 conducted a immunoblot analysis (Li et al., 2015). After one week of growth at 4°C, the  
462 relative FAX1 protein level in both overexpressor plants was higher than observed in wild  
463 type plants (Figure 6D), and a corresponding quantification experiment revealed that  
464 Ox#2 plants contained about 3-fold more FAX1 protein than present in wild type, while  
465 Ox#4 plants contained about 115-fold more FAX1 protein (Figure 6D, please note: loaded  
466 protein extracted from Ox#4 plants was 1:10 diluted when compared to proteins extracted  
467 from wild types and Ox#2 mutants).



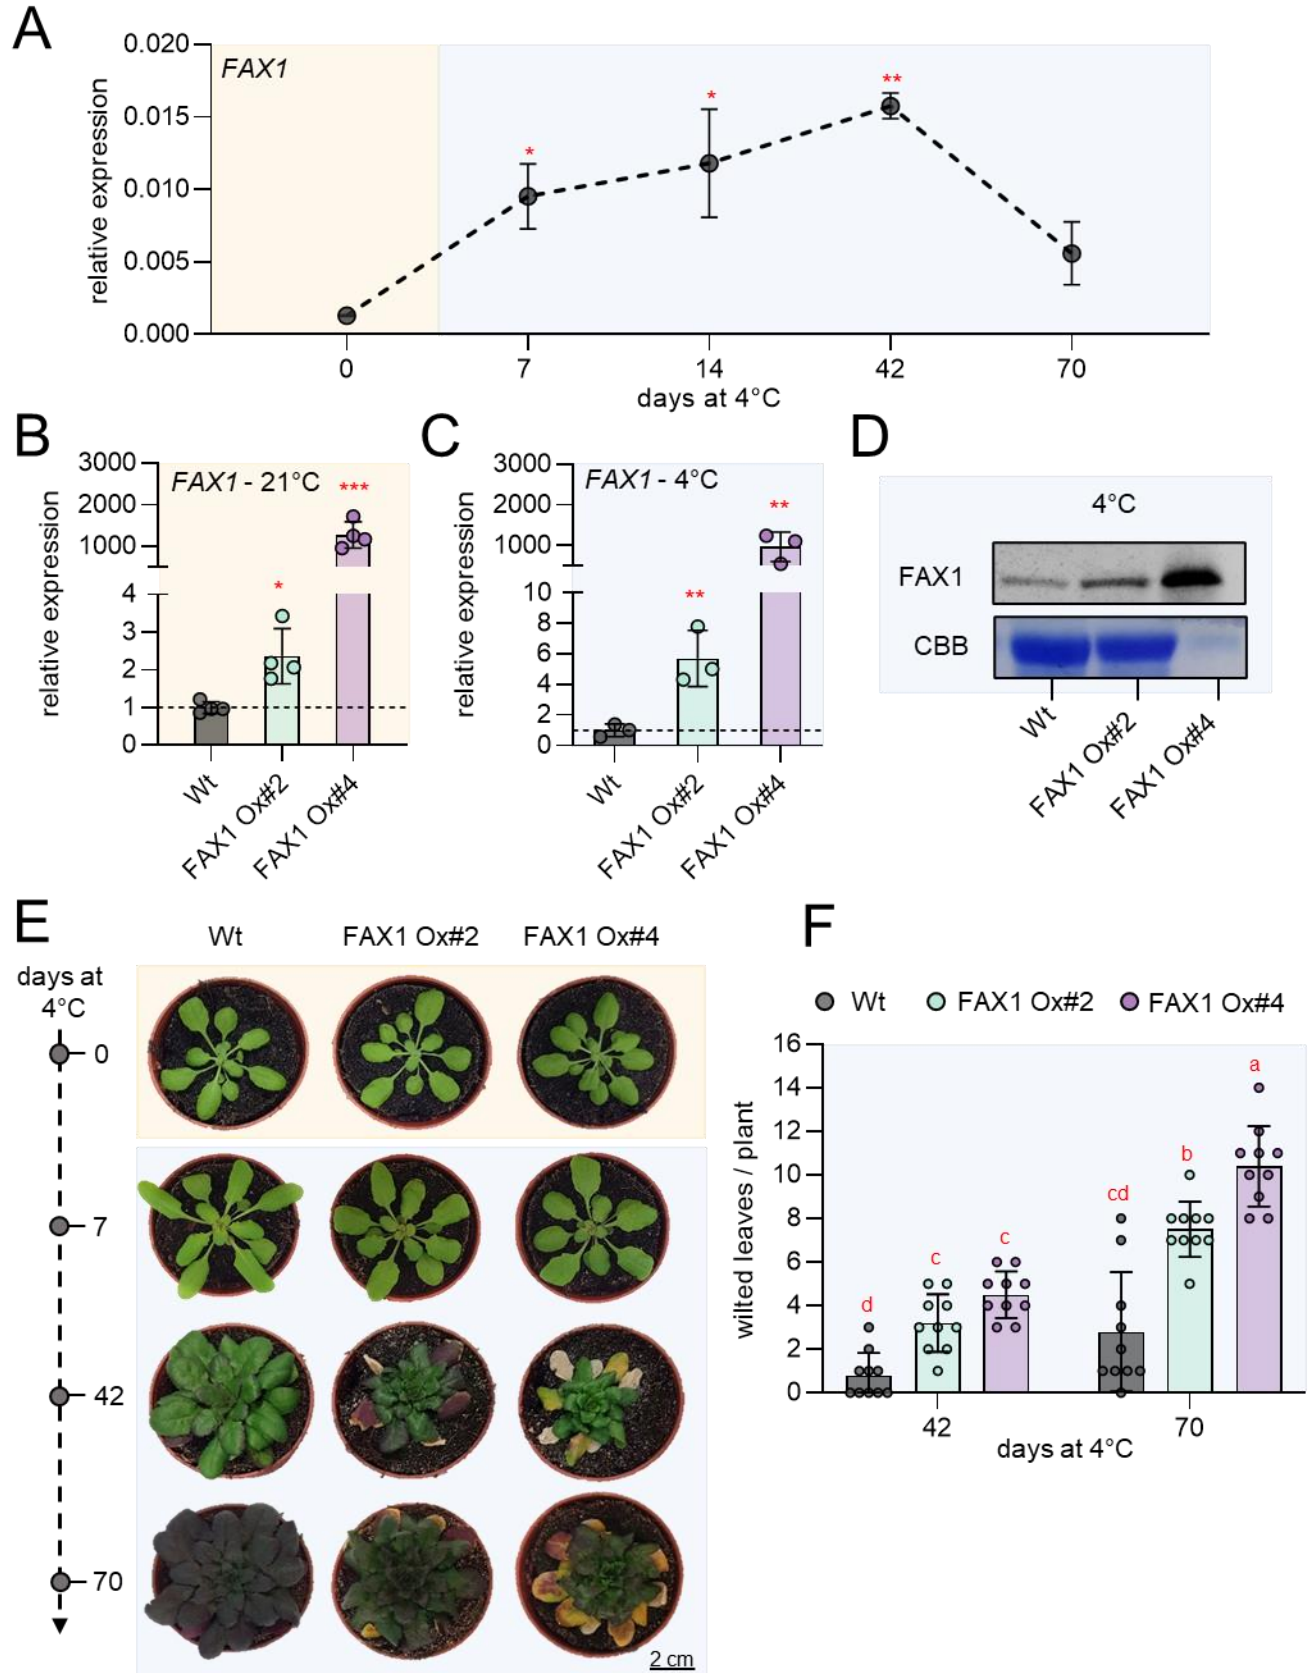

469 **Figure 6:** Gene expression, immunoblot and phenotypic analysis of two independent Arabidopsis  
470 fatty acid export protein 1 (FAX1) overexpression lines (FAX1 Ox#2 and FAX1 Ox#4) and wild-  
471 type (Wt) plants grown under standard and cold (4°C) conditions. Plants were grown under  
472 standard conditions (21°C day and night, 10h day length and 120µE light intensity) for 3 weeks  
473 and then treated with cold (4°C day and night, 10h day length and 120µE light intensity). A)  
474 Expression of FAX1 by qRT-PCR under standard growth conditions (0 days at 4°C) and several  
475 days during cold treatment (7; 14; 42, and 70 days at 4°C). Data represent relative mean  
476 expression levels of 3 biological replicates and are normalised to standard conditions (0 days at  
477 4°C) using UBQ as an internal control. Relative expression of FAX1 by qRT-PCR under B)  
478 standard growth conditions and C) 7 days after cold treatment. Data represent relative mean  
479 expression levels and are normalised to the wild type using UBQ as an internal control. D)  
480 Immunoblot analysis of FAX1 in crude extract from plants grown at 4°C for 7 days. The image of  
481 the Coomassie stained gel (CBB) shows equal loading of protein samples from Wt and FAX1  
482 Ox#2 with 30µg per lane. The amount of FAX1 Ox#4 protein is reduced to 3µg. E) Rosette  
483 phenotype of representative Wt, FAX1 Ox#2 and FAX1 Ox#4 under standard growth conditions  
484 (0 days at 4°C) and after cold treatment (7; 42, and 70 days at 4°C). F) Number of wilted leaves  
485 per plant after 42 and 70 days of cold treatment. Error bars in A) represent ± SEM. Error bars in  
486 B), C) and F) are ± SD. Statistical differences between wild-type and overexpressor lines in A), B)  
487 and C) were analysed by Student's t-test: p-value ≤0.05: \*; p-value ≤0.01: \*\*; p-value ≤0.001: \*\*\*.  
488 Letters above error bars in F) indicate significant differences by two-way ANOVA followed by  
489 Tukey's test (p<0.05; (Supplemental file 1)).  
490

491

492 **Similar to *rb11* mutants, FAX1 overexpressor plants exhibit decreased chilling and**  
493 **frost tolerance**

494 The data above indicate that *rb11* mutants exhibit increased cold sensitivity (Figure 1B,  
495 C). Because *rb11* mutants revealed higher FAX1 levels than present in wild types it was  
496 interesting to analyze whether the two lines constitutively expressing the *FAX1* gene also  
497 show altered response to low temperatures.

498 Therefore, we cultivated all plants at ambient temperature (21°C) prior to cultivation at  
499 4°C. Subsequently, we inspected morphologic plant appearance and the number of wilted  
500 leaves in the respective growth phase. After 7 days at 4°C none of the three plant lines  
501 developed wilted leaves (Figure 6E). However, after 42 days at 4°C, and even more  
502 pronounced after 70 days at 4°C, leaves from both FAX1 overexpressors gradually wilted  
503 more rapidly than observed in the wild type (Figure 6E).

504 To quantify this observation we counted the wilted leaves as a proxy for chilling sensitivity  
505 (Trentmann et al., 2020). After 42 days at 4°C wild type plants exhibited on average one  
506 wilted leaf while FAX1 overexpressor Ox#2 exhibited in average three wilted leaves, and



507 Ox#4 mutants showed in average 4.5 wilted leaves (Figure 6F). After growth for ten weeks  
508 at 4°C, wild type plants displayed on average 2.8 wilted leaves per plant while FAX1  
509 overexpressors Ox#2 and Ox#4 exhibited on average 7.5 and 10.4 wilted leaves,  
510 respectively (Figure 6F).

511 As done for *rb11* plants (Figure 2), we compared the frost tolerance of FAX1 over-  
512 expressor plants and wild types. In contrast to both FAX1 overexpressors, wild types  
513 which survived the post-freezing phase restored efficient growth within the next 14 days,  
514 as indicated by a larger rosette size and less wilted leaves when compared to over-  
515 expressor mutants (Figure 7A). FAX1 overexpressor plants able to recover from freezing  
516 exhibited about 80% of wilted leaves, while wild types only exhibited about 46% of wilted  
517 leaves (Figure 7A, B). With about 87% the survival rate of wild types reached a value  
518 similar to previous observations (Trentmann et al., 2020). In contrast, only 57% of the  
519 FAX1 Ox#2 plants survived this stress, and only 43% of FAX1 Ox#4 plants recovered  
520 from frost (Figure 7C).

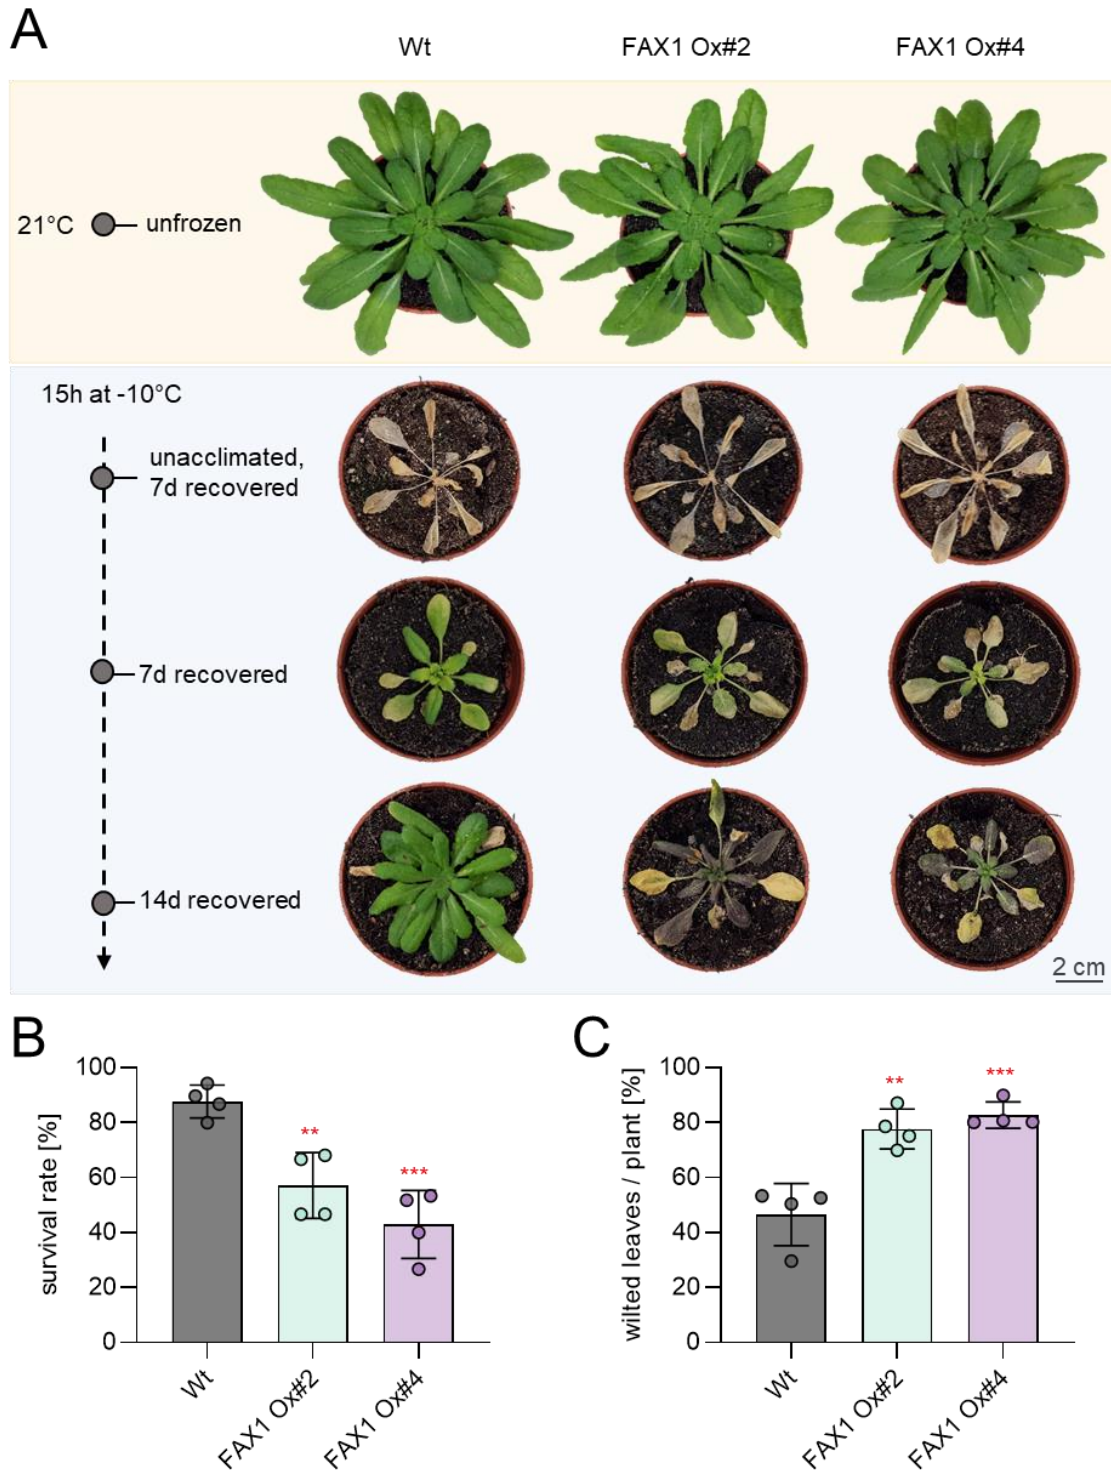

521

522 **Figure 7:** Recovery from frost is impaired in FAX1 overexpression mutants. Plants were cultivated  
523 for 3 weeks under standard growing conditions. Before freezing the temperature was lowered to  
524 4°C for 4 days (day and night temperature) for cold acclimation. Lowering of the temperature for  
525 freezing was done stepwise (2°C/h) and in completely dark. -10°C was kept for 15 h before a  
526 stepwise temperature raising to 21°C (2°C/h). A) representative Wt and FAX1 overexpression  
527 plants recovered from -10°C freezing. Pictures were taken 7 and 14 days after freezing, from

528 unacclimated and unfrozen (control) plants. B) Comparison of survival rate between Wt and FAX1  
529 overexpression mutants 7 days after  $-10^{\circ}\text{C}$  treatment. Data represent the mean value from four  
530 independent experiments with 11 to 15 plants per line and experiment. C) Quantification of wilted  
531 leaves from Wt and FAX1 overexpressor plants recovered for 7 days from  $-10^{\circ}\text{C}$  freezing under  
532 standard growing conditions. Data represent the mean value of 4 independent experiments.  
533 Statistical differences between wildtype and the overexpressor lines in B) and C) was analyzed  
534 by Student's t-test: p-value  $\leq 0.01$ : \*\*; p-value  $\leq 0.001$ : \*\*\* (Supplemental File 1).  
535

536

537 **Similar to *rb11* mutants, lipid biosynthesis in FAX1 overexpressors is shifted to the**  
538 **eukaryotic biosynthesis pathway under low temperature**

539 Under cold conditions, *rb11* mutants exhibited a shift towards ER-synthesized membrane  
540 lipids when compared to their corresponding wild type (Figure 5). To check whether this  
541 response is due to high FAX1 protein abundance, we analyzed the lipid composition in  
542 FAX1 overexpressors. For a first overview of cold effects on membrane lipid homeostasis  
543 in FAX1 overexpressor plants, we grew wild types and the representative FAX1 Ox#4 line  
544 (Li et al., 2015) under either control conditions, or for two weeks at  $4^{\circ}\text{C}$ . Subsequently,  
545 leaf lipids were extracted and quantified via mass-spectrometry.

546 When grown at  $21^{\circ}\text{C}$ , the total levels ( $\text{nmol mg}^{-1}$  DW) and the relative proportions (mol%)  
547 of the glycolipids MGDG, DGDG and SQDG, or of the phospholipids PA, PS, PI, PG, PE  
548 and PC were similar in leaves from wild types and FAX1 Ox#4 plants (Supplemental  
549 Figure 1A, B and insert). In contrast, after two weeks at  $4^{\circ}\text{C}$  FAX1 overexpressor plants  
550 contained higher levels of MGDG and DGDG when compared to wild types (Supplemental  
551 Figure 1C). In addition, the levels of PS-, PG-, PE- and PC FAX1 Ox#4 plants appeared  
552 to be slightly higher than in corresponding wild types (Supplemental Figure 1C). This  
553 increase led in sum to  $158 \text{ nmol mg}^{-1}$  DW of membrane lipids in FAX1 Ox#4 plants, while  
554 wild types contained only  $125 \text{ nmol mg}^{-1}$  DW membrane lipids (insert Supplemental Figure  
555 1C). Similar to the situation at  $21^{\circ}\text{C}$ , the proportions of all lipid species in both plant lines  
556 are nearly identical (Supplemental Figure 1D).

557 Since FAX1 overexpressor plants revealed impaired cold tolerance after long exposure to  
558 low temperatures, and because the observed changes in lipid composition of FAX1  
559 overexpressors after two weeks of growth at cold temperature appeared in parts to be  
560 moderate (Supplemental Figure 1), we extracted lipids from plants exposed for ten weeks

561 to 4°C (Figure 8). Similar to plants exposed to only two weeks at 4°C (Supplemental Figure  
562 1), both FAX1 overexpressor lines exhibited increased total levels of the galactolipids  
563 MGDG and DGDG, and also of the phospholipids PI, PG, PE and PC (Figure 8A). The  
564 increase of the two groups of lipids led to an overall higher level of total membrane lipids  
565 in FAX1 overexpressor lines (FAX1 Ox#2, 205 nmol mg<sup>-1</sup> DW; FAX1 Ox#4, 188 nmol mg<sup>-1</sup>  
566 DW; wild type, 125 nmol mg<sup>-1</sup> DW; (insert Figure 8A). The levels of the low abundant  
567 glycolipid SQDG and the phospholipid PS were not altered in FAX1 overexpressors, when  
568 compared to wild type (Figure 8A). Although total amounts of glycolipids in both FAX1  
569 overexpressors were higher when compared to wild types (Figure 8A), the relative  
570 contribution (mol %) of MGDG, DGDG and SQDG in FAX1 Ox#2 and #4 to total  
571 membrane lipids was similar to wild type (Figure 8B), while the relative contribution of the  
572 phospholipids PG, PE and PC in FAX1 Ox#2 and #4 to total membrane lipids was  
573 increased, when compared to the wild type (Figure 8B). The most pronounced alterations  
574 of phospholipids were noted for PC and PE (Figure 8B), which were 40% higher in FAX1  
575 overexpressors than in wild type plants (Figure 8B).

576 MGDG and DGDG represent the two most abundant glycerolipids in Arabidopsis leaves  
577 (Figure 8A). Interestingly, a closer inspection of the contents of the two MGDG molecular  
578 species 34:6 and 36:6 – which are indicative for either plastid-generated MGDG (34:6) or  
579 ER-born MGDG (36:6) - revealed clear differences between wild types and  
580 overexpressors. Wild-type plants exhibited about 85 mol% of 34:6 MGDG, while leaves  
581 from FAX1 Ox#2 and Ox#4 plants accumulated only 75 and 62 mol% of this MGDG  
582 species, respectively (Figure 8C). In marked contrast to this, wild type contained only 10  
583 mol% of the MGDG molecular species 36:6, while the FAX1 overexpressor plants Ox#2  
584 and Ox#4 accumulated 21 and 30 mol% of 36:6 MGDG, respectively (Figure 8C). The  
585 relative levels of 34:6 and 34:3 DGDG in wild type leaves were higher than in  
586 correspondingly grown FAX1 Ox#2 and Ox#4 plants. 34:6 DGDG in wild type amounted  
587 at 6.5 mol%, while FAX1 Ox#2 and Ox#4 plants contained only 5.6 or 4.6 mol%,  
588 respectively (Figure 8D). Eukaryotic ER-produced 36:6 DGDG in wild types amounted to  
589 a relative abundance of 61 mol%, while, similar to the increase of 36:6 MGDG, the two  
590 FAX1 overexpressors contained 75 and 74 mol% of 36:6 type DGDG, respectively (Figure  
591 8D). In summary, we can conclude that FAX1 overexpressor lines at cold temperatures  
592 accumulate ER-produced phospholipids – namely PC and PE – as well as galactolipids

593 (MGDG, DGDG) with DAG backbones from the eukaryotic pathway, while the proportions  
594 of prokaryotic 34:x galactolipids are reduced.

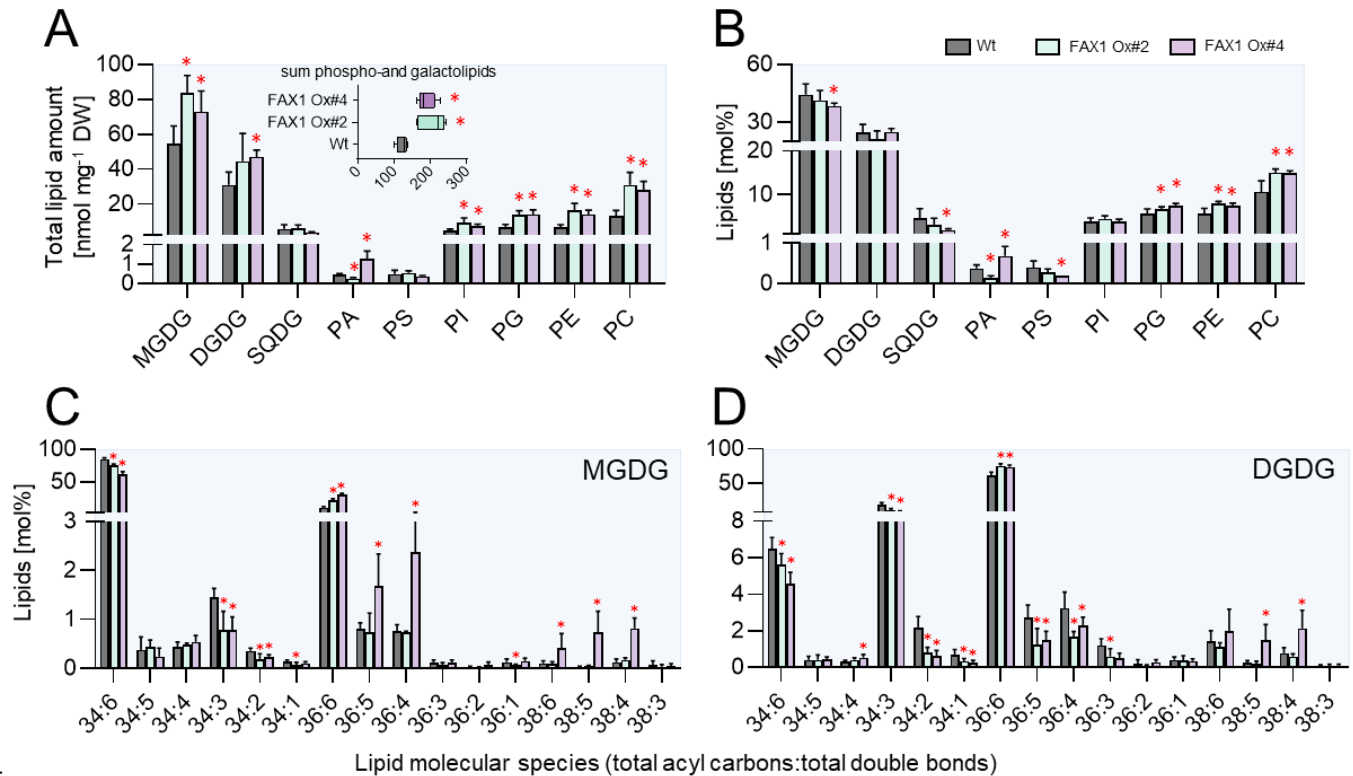

595  
596 **Figure 8:** Lipid analysis of Wt and FAX1 overexpression lines. Galacto- and phospholipids as well  
597 as galactolipid molecular species were determined in leaves of plants grown for 3 weeks under  
598 standard conditions before lowering the growth temperature to 4°C for 10 weeks. Changes in A)  
599 total contents and B) relative amounts of different galacto- and phospholipids. Boxplot in A)  
600 indicates changes in the sum of measured total lipid contents. Lipid composition of C)  
601 Monogalactosyldiacylglycerol (MGDG) and D) Digalactosyldiacylglycerol (DGDG) molecular  
602 species. Data represent mean values of 5 plants per line. Error bars represent ± SD. Significance  
603 of differences between wildtype and mutant lines was analyzed by Student's t-test: p-value ≤ 0.05.\*  
604 (Supplemental File 1).  
605

606 **FAX1 overexpressor lines show symptoms of impaired photosynthesis at early time**  
607 **points of cold exposure**

608 One marked phenotype of FAX1 overexpressor plants after transfer to cold conditions is  
609 the appearance of wilted, decayed leaves after some weeks of growth (Figure 6F, H).  
610 However, degradation of the FAX1 protein and first changes of the lipid composition are  
611 already observed after a few days at 4°C (Figure 1F and Supplemental Figure 1). To  
612 search for additional responses, we quantified photosynthetic parameters after short and



613 longer exposure to 4°C. To this end we grew all plants for 28 days at 21°C prior to transfer  
614 to at 4°C. At the beginning of the transfer, and after one or six weeks of growth at 4°C, we  
615 quantified the photosynthetic performance by measuring the following parameters: the  
616 ratio of variable- to maximal fluorescence ( $F_v/F_m$ ), PSII efficiency  $Y(II)$ , non-photochemical  
617 quenching  $Y(NPQ)$ , non-regulated quenching  $Y(NO)$ , and the rate of electron transport  
618 (ETR). This comprehensive analyses have been done using the pulse-amplitude-  
619 modulation (PAM) fluorometry method (Schreiber, 2004).

620 Prior to transfer to the cold, all wild type and the two FAX1 overexpressor plants exhibited  
621 similar  $F_v/F_m$  ratios (Figure 9A) which ranged around 0.79 (Figure 9B). After onset of cold  
622 temperatures, the  $F_v/F_m$  ratio decreased gradually in all three lines. Already after one  
623 week, the  $F_v/F_m$  ratio in both FAX1 overexpressor lines was significantly lower than  
624 displayed by the wild type, and after six weeks in the cold, wild type plants showed a  $F_v/F_m$   
625 ratio of 0.73, while both mutants exhibited a  $F_v/F_m$  ratio of about 0.68 (Figure 9A, B). This  
626 altered  $F_v/F_m$  ratio in the cold is not reflected by an increased NPQ, although FAX1 Ox#2  
627 plants showed a slightly increased NPQ, after 7 days in the cold. However, this was not  
628 found for FAX1 Ox#4 plants (Figure 9) and even after 5 weeks in the cold, NPQ in all three  
629 lines was similarly decreased (Figure 9C). The photosynthetic quantum yield  $Y(II)$  of all  
630 three plant lines was similar when grown under control temperature (Figure 9C). In  
631 contrast, both FAX overexpressors showed after 7 or 42 days in the cold a decreased  
632  $Y(II)$  and an increased energy dissipation via non-regulated quenching  $Y(NO)$ , which was  
633 especially pronounced after 42 days (Figure 9C). While the chloroplastic electron  
634 transport rate (ETR) of all three plant lines was similar at the beginning of the cold  
635 treatment, the ETR in both FAX1 overexpressor plants was after 7 days at 4°C markedly  
636 lower, when compared to corresponding wild type plants (Figure 9C).

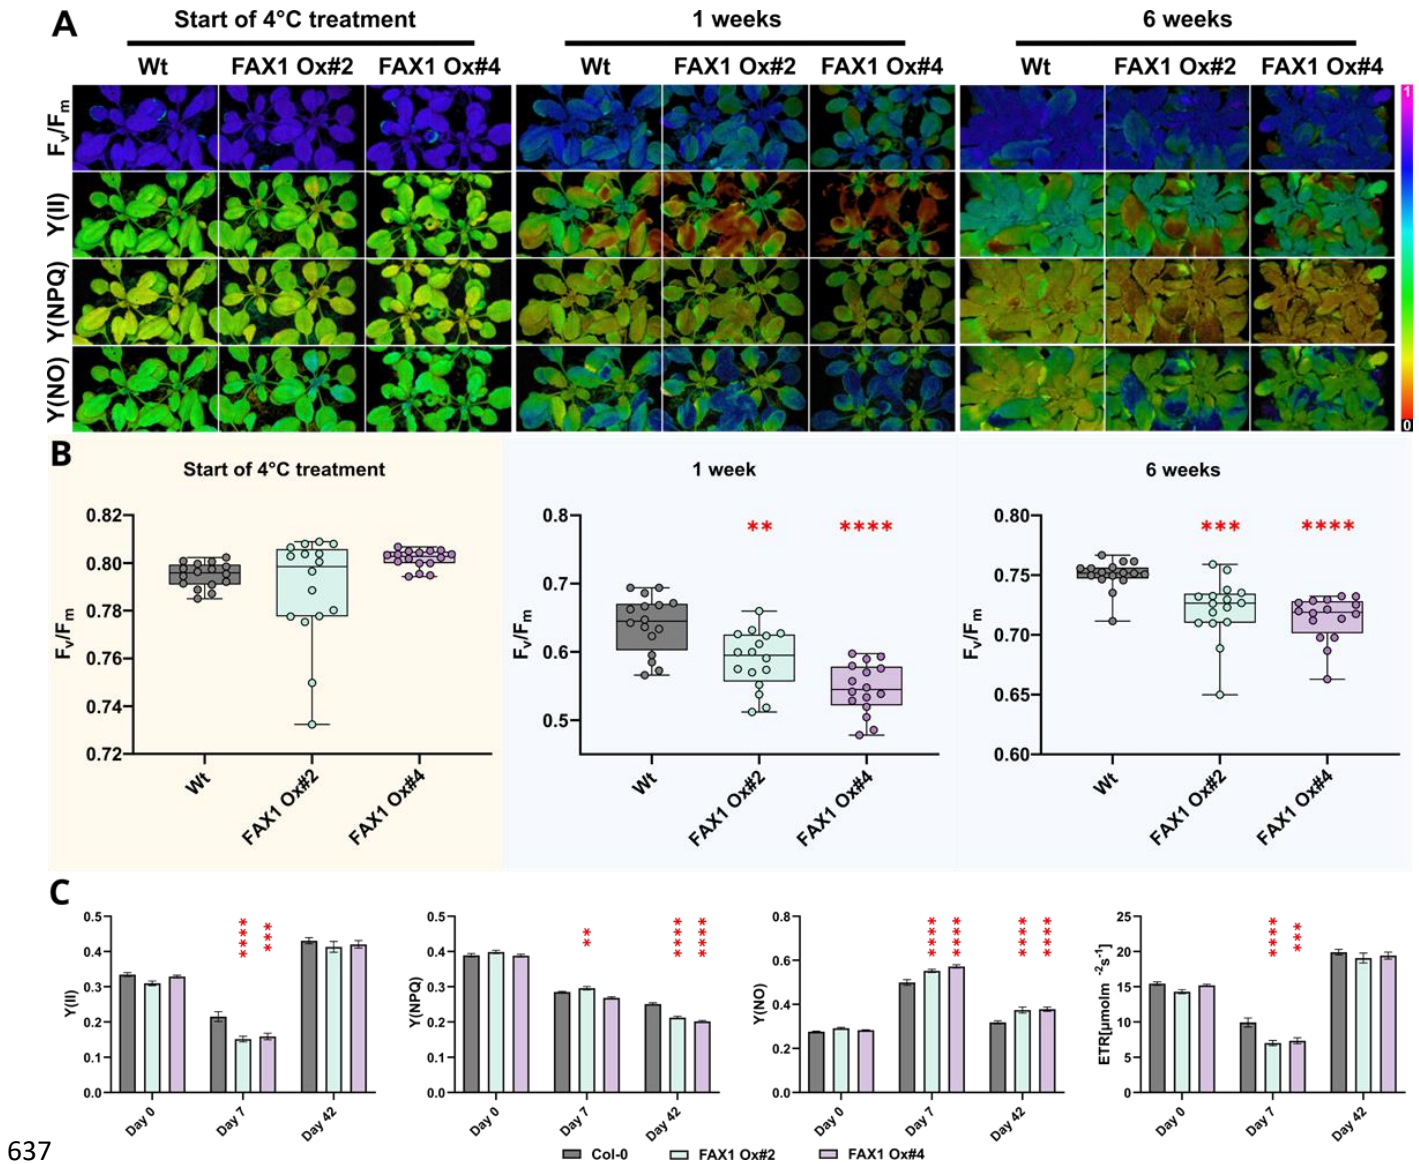

637

638 **Figure 9:** Cold-dependent PSII alterations in FAX1 over expressor lines. After 28 days of growth  
 639 under short-day (10/14 hours; 110 PAR) conditions at RT, plants (Col-0; FAX1 Oex#2; FAX1  
 640 Oex#4) were shifted to a 4°C short-day (110 PAR) chamber. Pulse-Amplitude-Modulation (PAM)  
 641 induction curve measurements at 110 PAR were performed on day 0 as well as after 7 days and  
 642 42 days of the cold treatment. A) Representative PAM images are depicted for PSII capacity  
 643 ( $F_v/F_m$ ), yield (Y(II)), the quantum yield of light-induced non-photochemical fluorescence  
 644 quenching (Y(NPQ)), and quantum yield of nonregulated energy dissipation (Y(NO)). B)  $F_v/F_m$   
 645 determination of the three genotypes at the start of the cold treatment, after one and five weeks.  
 646 C) Induction curves were generated until a steady-state phase of Y(II), Y(NPQ); Y(NO), and  
 647 electron transport rate (ETR [ $\mu\text{mol m}^{-2} \text{s}^{-1}$ ]) were reached. The data shown represents this steady-  
 648 state after 600 seconds. N = 16; Mean;  $\pm$  SEM; p-value: (one-way ANOVA): \* = 0.033; \*\* = 0.0021;  
 649 \*\*\* = 0.0002; \*\*\*\* = 0.0001 (Supplemental File 1).

650

651 **FAX1 overexpressor and *rb11* mutants exhibit signs of reactive oxygen species**  
652 **(ROS) accumulation**

653 Several systemic changes in FAX1 overexpressors and *rb11* mutants occur quite rapidly  
654 after transfer to cold conditions. For example, first changes in the lipid composition of both  
655 types of mutants are already present after two weeks at 4°C (Figure 5 and Supplemental  
656 Figure 1) and alterations in photosynthetic parameters of FAX1 overexpressors are  
657 already present after one week of growth at low temperature (Fig. 7). Given that both  
658 types of mutants contain higher FAX1 abundance than present in wild types (Figures 1  
659 and 4) and show similar shifts in lipid biosynthesis (Figure 5 and Supplemental Figure 1)  
660 we searched for further similarities in their molecular responses after transfer into cold  
661 conditions.

662 The accumulation of both, anthocyanins and reactive oxygen species (ROS) can be taken  
663 as early responses upon onset of abiotic stress stimuli (Chalker-Scott, 1999; Baxter et al.,  
664 2014). When grown at 21°C, *rb11* plants and the two FAX1 overexpressor lines contain  
665 similar levels of anthocyanins as wild type plants (Figure 10A). In contrast, when exposed  
666 to 4°C for only one week, *rb11* mutants and FAX1 overexpressors accumulated  
667 significantly more anthocyanins than the correspondingly grown wild types (Figure 10A).  
668 The levels of the transcript coding for the protein BAP1, which indicates the cold-induced  
669 occurrence of ROS (Yang et al., 2007; Zhu et al., 2011), was unchanged between the  
670 plant lines when grown at 21°C (Figure 10B). Similar to the anthocyanin accumulation,  
671 *BAP1* mRNA accumulated to much higher extents in both types of mutants after one week  
672 of growth at 4°C, than in wild type plants (Figure 10B).

673 To corroborate the differences in cold-induced ROS levels in wild types and the two types  
674 of mutants, we analyzed the relative increase in leaf superoxide by nitroblue-tetrazolium  
675 (NBT) staining (Doke, 1983; Hoffmann et al., 2013). NBT staining of wild-type tissue at  
676 the start of cold treatment and after four days at 4°C does not result in a detectable  
677 increase in superoxide (Figure 10C). However, both types of mutants showed a stronger  
678 NBT staining after four days at 4°C than at the beginning of cold treatment (Figure 10C).



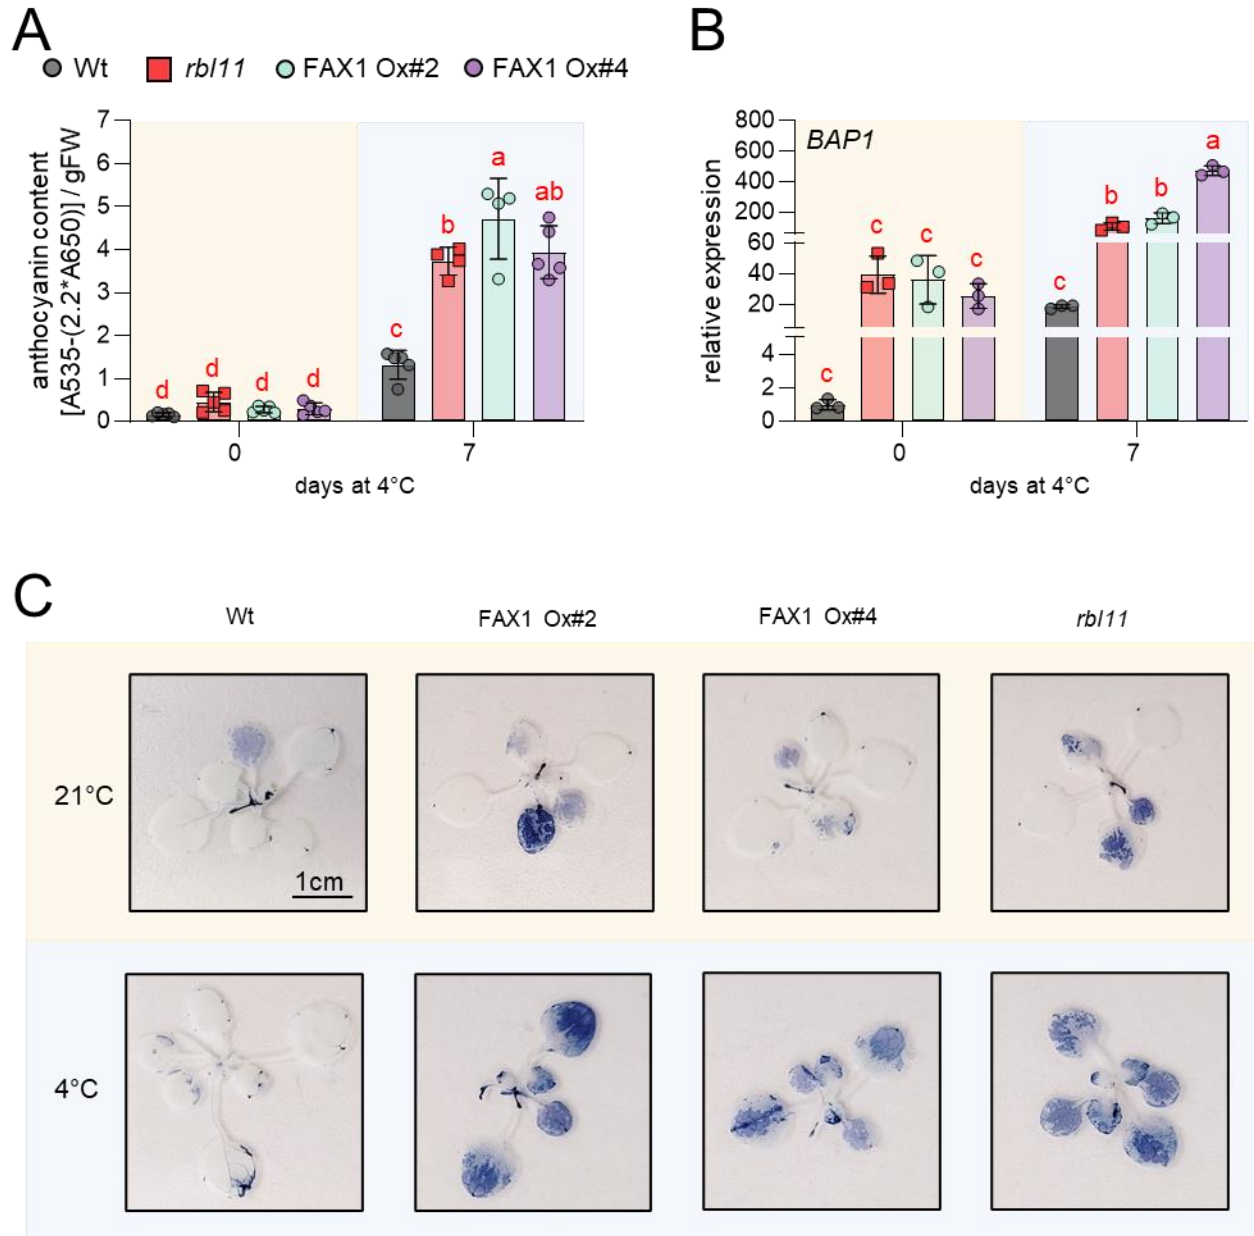

679

680 **Figure 10:** Anthocyanin and reactive oxygen species (ROS) accumulation in *rb111* loss of function  
 681 mutants and FAX1 overexpressors at low temperatures. A) Impact of cold on anthocyanin  
 682 accumulation under ambient conditions and after 7 days at 4°C. B) Relative transcript levels of  
 683 *BAP1* during standard conditions and after 7 days at 4°C. C) NBT staining of O<sub>2</sub><sup>-</sup> accumulation.  
 684 Plants were grown for 2 weeks under control conditions and subsequently cultivated at 4°C for 4  
 685 days. Error bars in A) and B) represent ± SD. Letters displayed over the error bars indicate  
 686 significant differences analyzed by two-way ANOVA followed by Tukey's multiple comparisons  
 687 test (p-value <0.05; (Supplemental File 1)).  
 688

689

690 **FAX1 overexpressor plants exhibit altered levels of metabolites when exposed to**  
691 **cold temperatures**

692 To gain additional insight into metabolic causes for the impaired cold- and frost tolerance  
693 pattern of FAX1 overexpressor lines, we analyzed the levels of 71 primary metabolites via  
694 GC-MS. Thus, wild-type plants and both FAX1 overexpressor lines were grown for 28  
695 days at 21°C prior to growth at 4°C for two weeks.

696 When cultivated at 4°C for two weeks, the FAX1 overexpressor lines showed the largest  
697 differences in their metabolic readjustment compared to correspondingly grown wild-type  
698 plants (Figure 11, Supplemental Table 4). The two FAX1 overexpressor lines contained  
699 nearly doubled levels of  $\beta$ -alanine, asparagine, serine and ethanolamine, 1.7-fold  
700 increased amounts of glycerol-phosphoglycerol and 1.7-fold more malate when compared  
701 to wild types (Figure 11). Similar to malate, three further intermediates of the tricarboxylic  
702 acid cycle, namely citrate, fumarate and succinate were also significantly higher in cold  
703 treated FAX1 overexpressors than in wild type plants (Figure 11). In addition, cold treated  
704 FAX1 overexpressors contained about 38% more proline, about twice as much putrescine  
705 and 2.3-fold more spermidine when compared to corresponding wild types, whereas the  
706 trehalose concentration in FAX1 Ox#2 plants was substantially lower, compared to wild  
707 types (Figure 11).

708

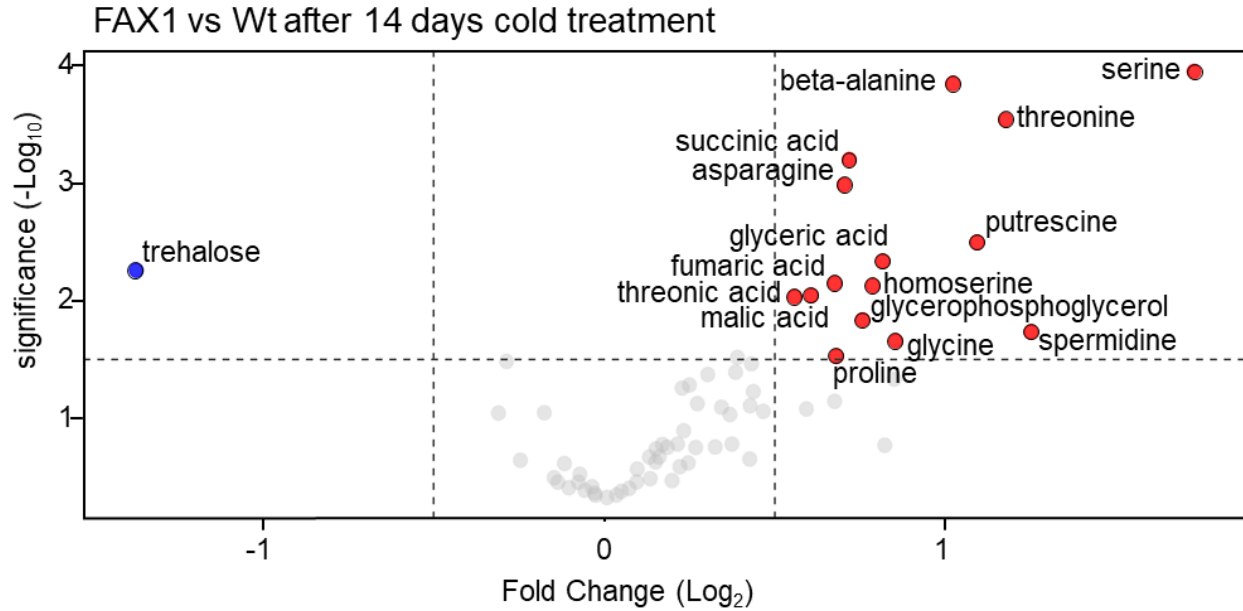

709  
710 **Figure 11:** Volcano plot of the metabolic differences measured between Wt and FAX1 Ox#2  
711 rosette leaves, cold treated for 14 days at 4°C. Blue dots represent decreased and red dots  
712 increased metabolites with a  $\log_2$  fold change  $\geq 0.5$  and  $p$ -value  $\leq 0.05$ . The complete data set is  
713 available in Supplemental Table 4.  
714 Significant differences between the 21°C and 4°C treatments were analyzed using a t-test  
715 (Supplemental File 1).  
716  
717

## 718 Discussion

719 The dynamic modification of plant organelle proteomes is mandatory to achieve new  
720 homeostatic levels allowing to cope with challenging environmental conditions (Taylor et  
721 al., 2009). As seen in many systems, cellular mRNA level and the respective protein  
722 amounts do not necessarily correlate to a high degree (Gygi et al., 1999; Greenbaum et  
723 al., 2003; Koussounadis et al., 2015). Thus, other factors are also important for controlling  
724 protein abundance. The chloroplast envelope proteome undergoes substantial remodel-  
725 ing in response to changes in light or temperature conditions (Knopf et al., 2012;  
726 Nishimura et al., 2016; Adam et al., 2019; Mielke et al., 2020) and it can thus be expected  
727 that proteases must play a role for this.

728 Interestingly, cold-induced changes in the proteome are accompanied by modifications of  
729 membrane lipids. Latter process maintains membrane fluidity at low temperatures and  
730 stabilizes membrane integrity (preventing rigidification) to ensure proper organelle  
731 function (Moellering et al., 2010; Zheng et al., 2011; Barnes et al., 2016; Barrero-Sicilia et  
732 al., 2017; Guo et al., 2018). For lipid biosynthesis, especially for the generation of phos-  
733 pholipids, fatty acid export from the chloroplast is mandatory. and the FAX1 protein is the  
734 best characterized chloroplast envelope located protein presumed to be involved in this  
735 transport process so far (Li et al., 2015; Li et al., 2016; Xiao et al., 2021).

736 In *Arabidopsis* FAX1 abundance rapidly decreases after transfer to cold temperatures  
737 while other envelope proteins increase (Trentmann et al., 2020). Taking the proteins NTT  
738 (the chloroplast ATP importer (Tjaden et al., 1998) or MEX1 (the chloroplast maltose  
739 exporter) (Niittylä et al., 2004) as examples, we demonstrated that the relative changes  
740 of these carriers are key to proper cold tolerance (Trentmann et al., 2020). However, in  
741 the case of FAX1, it is unknown whether the decreased protein abundance is a controlled  
742 process required to tolerate low environmental temperatures. In addition, no protease has  
743 been discovered that could mechanistically explain the decreased abundance of selected  
744 envelope-associated proteins in the cold.

745 Compared to *RBL10* and *FtsH11* mRNAs, the *RBL11* transcript accumulates early after  
746 cold exposure (Figure 1A). This correlation is a first indication of a specific molecular  
747 interaction between RBL11 and FAX1, and a physical contact between these two proteins,

748 which is a prerequisite for FAX1 degradation, was confirmed by BiFC analysis (Figure 2).  
749 The suggestion of a specific effect of RBL11 on FAX1 abundance in the cold is supported  
750 by two observations. First, cold-induced FAX1 degradation did not occur in *rb11* mutants  
751 (Figure 1E), whereas *rb10* or *ftsh11* mutants degraded FAX1 in the cold similarly to wild-  
752 type plants (Figure 1E). Second, dexamethasone-induced expression of RBL11 leads to  
753 a decrease in FAX1 protein (Figure 4C).

754 In general, the ability of RBL11 to degrade intrinsic membrane proteins with multiple  
755 transmembrane domains, such as FAX1 (Li et al., 2015), is consistent with the properties  
756 of other rhomboid proteases (Erez and Bibi, 2009). However, since dexamethasone-  
757 induced expression of RBL11 leads to FAX1 degradation only at cold temperature and  
758 not at 21°C (Figure 4C), we propose a so far unknown post-translational modification of  
759 RBL11 and/or FAX1, which is a prerequisite for catalytic protease activity (Figure 4C). The  
760 observation that RBL11 activity might also be involved in the dynamic change TGD5 and  
761 TGD2 (Table 1), two components of the TGD complex involved in the unidirectional ER  
762 to plastids import of eukaryotic lipids (Xu et al., 2010; Li-Beisson et al., 2017), point to a  
763 central function of this protease in modification of plant lipid homeostasis under  
764 challenging temperature conditions. Notably, RBL10, the closest RBL11 homologue, has  
765 also been shown to affect lipid metabolism as it interacts with the ACYL CARRIER  
766 Protein4 and modulates MGDG biosynthesis (Lavell et al., 2019; Xu et al., 2023). Because  
767 *rb11* mutants exhibit a shift toward eukaryotic lipid biosynthesis (which is due to  
768 decreased FAX1 abundance but not observed in wild types, Figures 3 and 6,  
769 Supplemental Figure 1), we hypothesize that *rb11* cells attempt to reduce the unintended  
770 stimulation of eukaryotic lipid biosynthesis by downregulating the core plastid lipid  
771 importer TGD (Table 1). This assumption is supported by the observation that Arabi-  
772 dopsis, as a 16:3 plant, normally stimulates the plastid membrane lipid pathway after  
773 exposure to cold conditions (Li et al., 2015; Yu et al., 2023).

774 Apart from FAX1 and TGD components, which act as substrates for RBL11, it is worth  
775 mentioning that the protochlorophyllide oxidoreductase PORA strongly accumulates in  
776 *rb11* mutants (Table 1). PORA is responsible for the stromal conversion of  
777 protochlorophyllide to chlorophyllide and it was shown, that increased protochlorophyllide  
778 oxidoreductase activity leads to ROS formation (Pattanayak and Tripathy, 2011). Thus,

779 RBL11 might not only contribute to the regulation of FAX1 activity but also influence  
780 envelope-located mechanisms preventing cold-induced ROS formation.

781 *rb11* mutants exhibit in cold conditions both, higher FAX1 protein levels than observed in  
782 wild types (Figure 1E) and a shift of their lipid composition towards accumulation of  
783 phospholipids (Figure 5). The latter observation is in accordance with both, the function  
784 of FAX1 as a chloroplast to ER fatty acid (FA) export protein (Li et al., 2015; Li et al., 2016;  
785 Li-Beisson et al., 2017; Takemura et al., 2019; Tian et al., 2019) and the function of the  
786 ER as the cellular site of phospholipid biosynthesis (Li et al., 2015; Li et al., 2016; Li-  
787 Beisson et al., 2017; Takemura et al., 2019; Tian et al., 2019). In fact, apart from a  
788 stimulation of the eukaryotic pathway of lipid biosynthesis in the cold, *rb11* plants and  
789 FAX1 overexpressors share further similarities, e.g., impaired tolerance to low  
790 temperatures and frost (Figures 1, 2 and 7), and increased levels of anthocyanins, ROS  
791 and *BAP1* transcripts in the cold when compared to wild types (Figure 10A-C). Latter  
792 changes are independent molecular markers for a reinforced stress situation in mutants  
793 (Chalker-Scott, 1999; Choudhury et al., 2017)

794 Although in sum these similarities are indicative for an important function of the down  
795 regulation of FAX1 during cold tolerance, a detailed analysis of the impact of FAX1 on this  
796 process cannot be made in the *rb11* mutants, since RBL11 acts on several inner envelope  
797 proteins, which triggers pleiotropic effects in *rb11* plants (Supplemental Tables 1 and 3,  
798 and Table 1). Thus, the impact of FAX1 on cold and frost tolerance was analyzed using  
799 FAX1 overexpressors. Although the relative abundancies of *FAX1* mRNA and protein  
800 differed substantially between Ox#2 and Ox#4 mutants, it turned out that the physiological  
801 responses of the two plant lines were very similar (Li et al., 2015 and below). Accordingly,  
802 these lines are suitable to search for a potential impact of a cold-induced down regulation  
803 of FAX1 levels for tolerance to low temperatures.

804 The observation that FAX1 overexpressor leaves exhibited higher levels of ER-derived  
805 membrane lipids (PE, PC) when exposed to cold temperature (Figure 8 and Supplemental  
806 Figure 1B) indicates that the cold-induced decrease of FAX1 in wild types (Trentmann et  
807 al., 2020) is a limiting factor for synthesis of lipid backbones via the eukaryotic pathway at  
808 low temperature. Our assumption that a relative stimulation of lipid biosynthesis in the ER  
809 is causative for increased total levels of galacto- and phospholipids in FAX1



810 overexpressors gains independent support by observations made on mutants lacking the  
811 envelope proteins TGD2 or TGD3. Corresponding loss-of-function mutants show  
812 decreased levels of MGDG and DGDG with ER-derived DAG-backbones, while ER-borne  
813 phospholipid levels are increased (Awai et al., 2006; Lu et al., 2007). In other words, a  
814 higher substrate availability such as acyl residues at the ER might lead to increased levels  
815 of membrane lipids with ER-derived DAG backbones (Figure 12).

816 MGDG represents the most abundant chloroplast-located galactolipid (Dorne et al., 1990;  
817 Kobayashi, 2016) and in the 16:3 plant *Arabidopsis*, two main molecular species occur  
818 i.e., plastid derived 34:6 type MGDG and, as ER derived, 36:6 type MGDG (Boudière et  
819 al., 2014). When compared to wild types, Ox#4 mutants grown at 21°C exhibit a relative  
820 decrease of 34:6 type MGDG, which is nearly balanced by a corresponding increased  
821 level of 36:6 type MGDG (Figure 8C), and the proportion of 34:6 DGDG is decreased,  
822 while 36:6 DGDG is increased when comparing wild type with Ox#4 plants grown at 4°C  
823 (Figure 8D). Thus, the latter observation indicates that a stimulated fatty acid export in  
824 Ox#2 and Ox#4 plants leads to a shift from plastid-derived to ER-derived galactolipids.  
825 Such flexible shift of lipid biosynthesis from plastids to the ER has already been observed  
826 for mutants lacking the plastid glycerol-3-phosphate acyltransferase (ACT) activity  
827 (Falcone et al., 2004; Lusk et al., 2022), and also in *act1* mutants (synonymous: *ats1*) a  
828 stimulation of membrane lipid biosynthesis in the ER largely compensates for the impaired  
829 prokaryotic lipid biosynthesis (Kunst et al., 1988). The observation that FAX1  
830 overexpressors not only exhibit an increased ratio of 36:6 to 34:6 type MGDG (Figure 8C),  
831 but also increased ratios of 36:6 to 34:6-, and 36:6 to 34:3 type DGDGs (Figure 8D) further  
832 underlines the shift from prokaryotic to eukaryotic lipid biosynthesis in these lines. Finally,  
833 the increase of the relative proportions of the two most abundant phospholipids, PC and  
834 PE, supports the conclusion that the eukaryotic lipid biosynthesis pathway is stimulated  
835 in FAX1 overexpressors.

836 The analyses of the molecular responses of the FAX1 mutants to cold and freezing  
837 conditions showed that these changes are associated with a strongly impaired ability to  
838 resist low environmental temperatures, as evidenced by an increased number of wilted  
839 leaves in the cold and a decreased ability to recover from freezing (Figures 2 and 7). A  
840 similar gradual decay of leaves was also seen for other *Arabidopsis* mutants exhibiting

841 decreased amounts of polyunsaturated fatty acids in membrane lipids (Miquel et al., 1993)  
842 and of course for the *rb11* mutant (Figure 1). It seems likely, that the increased number  
843 of wilted leaves of FAX1 overexpressors when grown at 4°C (Figure 6E and F) is the result  
844 of an impaired photosynthetic performance (Figure 9A,C).

845 The exact reasons for these marked effects are not clear, but it was shown that changes  
846 in the composition of membrane lipids, induced by modifications of different lipid  
847 biosynthesis genes, affect photosynthetic properties (Botté et al., 2011; Kobayashi, 2016;  
848 Gao et al., 2020). Thus, it seems conceivable that the altered chloroplast membrane  
849 composition observed in FAX1 overexpressors (Supplemental Figure 1 and Figure 8) is  
850 causative for the impaired photosynthetic performance. Indeed, the decreased  $F_v/F_m$  ratio  
851 of FAX1 overexpressor plants (Figure 9A,B) is an indicator of impaired PSII function  
852 (Murchie and Lawson, 2013) and a temperature stressed PSII can lead to ROS production  
853 (Pospíšil, 2016), as observed in FAX1 overexpressor plants (Figure 10C-F). However, it  
854 cannot be excluded that the marked effects of RBL11 mutation or FAX1 overexpression  
855 on PC and PA levels (Figures 5C,D and 8A,B) also contribute to ROS accumulation  
856 (Figure 10). This is because the signaling molecule PA has been shown to bind directly  
857 to the plasma membrane NADPH oxidoreductase RBOHD, leading to the activation of this  
858 enzyme. Accordingly, this process stimulates  $O_2^-$  production, which ultimately leads to  
859  $H_2O_2$  accumulation (Zhang et al., 2009).

860 Wild-type plants and FAX1 overexpressor lines exhibit a quite similar metabolite pattern  
861 when grown at 21°C. In contrast, the metabolite composition of FAX1 Ox plants during  
862 growth at 4°C is to some degree indicative for reinforced cold stress. For example, the  
863 comparably high accumulation of polyamines in form of putrescine and spermidine, of  
864 amino acids like proline and asparagine, or the accumulation of the non-proteinogenic  
865 amino acid  $\beta$ -alanine (Figure 11) represent independent evidences for a pronounced  
866 metabolic response to cold temperatures (Alet et al., 2011; Liang et al., 2013; Zhang et  
867 al., 2016; Marco et al., 2019; Parthasarathy et al., 2019).  $\beta$ -alanine is not only a metabolic  
868 indicator for abiotic stress (Parthasarathy et al., 2019), it also acts as precursor for CoA  
869 synthesis and is thus required for fatty acid and phospholipid biosynthesis (Perrett et al.,  
870 2017). Therefore,  $\beta$ -alanine accumulation is coincident with higher total levels of galacto-  
871 and phospholipids in FAX1 overexpressors in the cold (Figure 11A). Under many stress



872 conditions, asparagine and proline levels change similarly (Curtis et al., 2018). While the  
873 exact function of asparagine during stress is unclear, the role of proline as a general stress  
874 metabolite is well established (Liang et al., 2013; Ghosh et al., 2022). For example, proline  
875 is able to diminish PS<sub>II</sub> defects caused by rising ROS levels (Alia and Mohanty, 1997) and  
876 because cold treated FAX1 overexpressors exhibit defects in PS<sub>II</sub> activity (Figure 9A-C),  
877 the induce proline accumulation might represent a process to tune down such negative  
878 effects.

879 In summary, we propose a model in which the envelope protease RBL11 is responsible  
880 for the degradation and down-regulation of FAX1 in cold-treated *Arabidopsis* plants  
881 (Figure 12). This process represents a previously hidden molecular response that is  
882 critical for optimal low temperature acclimation. Most likely, the initial cold response in  
883 wild-type plants is represented by a preference for the prokaryotic lipid synthesis pathway  
884 to protect chloroplast membranes and the photosynthetic machinery from cold damage.  
885 Since the corresponding *FAX1* mRNA is not decreased in cold-treated wild-type plants  
886 (Figure 6A), the decreased FAX1 protein level is most likely due to a specific effect of  
887 RBL11. In near future it will be interesting to search for factors that activate RBL11 and/or  
888 convert selected membrane proteins on the inner envelope proteins into specific  
889 substrates (Figure 12). It seems worth to mention, that the cold-induced degradation of  
890 FAX1 further supports findings on the importance of various chloroplast envelope  
891 associated processes for plant cold and frost tolerance (Moellering et al., 2010; Barnes et  
892 al., 2016; Guan et al., 2019; Schwenkert et al., 2023).

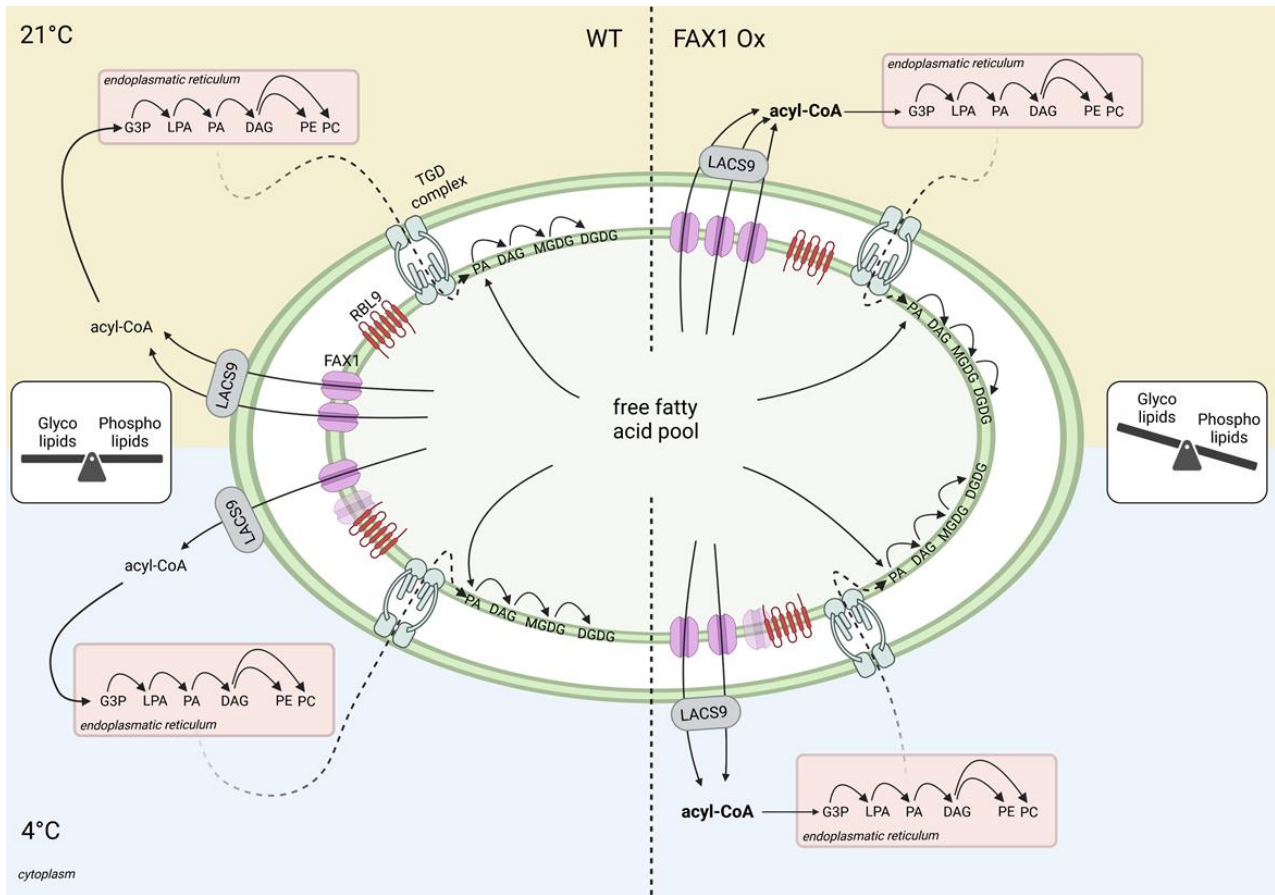

893

894 **Figure 12:** Proposed model for the influence of the fatty acid export protein1 (FAX1) abundance,  
 895 controlled by the envelope located rhomboid-like protease11 (RBL11), on cold adaptation via  
 896 balancing the glyco- and phospholipid contents in Arabidopsis.

897 In wild types, the the glyco- and phospholipid levels are balanced to gain ideal conditions for  
 898 growth and development under diverse environmental conditions. During low temperature, RBL11  
 899 interacts with FAX1, which leads to a decrease of FAX1 abundance. The associated reduced  
 900 export of fatty acids, and concomitted slowdown of the eukaryotic pathway for lipid biosynthesis,  
 901 seems to be an efficient mechanism for cold acclimation. In FAX1 overexpressing (Ox) plants  
 902 however, the permanent increased export of fatty acids from the chloroplast, which stimulates lipid  
 903 biosynthesis in the Endoplasmic Reticulum, leads to a shift to phospholipid synthesis. In FAX1 Ox  
 904 lines, RBL11 is unable to decrease FAX1 protein abundance, and the disturbed glyco- to  
 905 phospholipid ratio impairs the efficient acclimation to cold temperatures, results in cold- and frost  
 906 sensitive mutants.

907

## 908 **Material and Methods**

### 909 **Plant cultivation and growth conditions**

910 *Arabidopsis* (*Arabidopsis thaliana*) ecotype Columbia (Col-0) and transgenic plants were  
911 sown on standard soil (type ED73, Einheitserde Patzer; Sinntal-Altengronau, Germany)  
912 with 10% (v/v) sand, stratified at 4°C for 48 h and then grown under short-day regime (10  
913 h light/14 h dark) at 60% relative humidity and 120  $\mu\text{mol m}^{-2} \text{s}^{-1}$  light intensity at 21°C,  
914 representing standard growth conditions. For cold treatment, plants were grown for  
915 21 days at 21°C first and subsequently transferred to a cultivation chamber (Fitotron  
916 SGR223, Weis-Gallenkamp Technik, Heidelberg, Germany) and incubated for several  
917 days at 4°C while all other parameters were kept constant.

918 We described FAX1 Ox#2 and FAX1 Ox#4 lines earlier (Li et al., 2015). *rb10* mutants  
919 (Lavell et al., 2019) were provided by Dr. Christoph Benning (Michigan State University,  
920 Wisconsin, USA), *ftsh11* and *rb11* mutants (Knopf et al., 2012; Adam et al., 2019) were  
921 provided by Dr. Zach Adam (Hebrew University, Jerusalem, Israel).

922 For RNA extraction, metabolite and anthocyanin analysis, *Arabidopsis* rosette leaves  
923 were collected five hours after onset of light, transferred immediately into liquid nitrogen  
924 and stored at -80°C until preparation. Leaf material for chloroplast envelope isolation was  
925 used directly after harvesting one hour before the start of illumination. For lipid isolation,  
926 rosette leaves were collected and directly transferred in a glass tube containing boiling  
927 water.

928

### 929 **Generation of RBL11 overexpressor lines**

930 The cloning steps to generate the dexamethasone-inducible RBL11 overexpression lines  
931 were performed using S7 Fusion Polymerase™ (MD-S7-100, Mobidiag, Espoo, Finland).  
932 The sequence of BirA-HA was first amplified from the Vector pcDNA3.1 MCS-  
933 BirA(R118G)-HA (Roux et al., 2012) using gene-specific primers and ligated C-terminally  
934 of *RBL11* in the pBSK vector (Short et al., 1988) by overlap extension PCR. The *RBL11*-  
935 BirA-HA construct was amplified using gene-specific primers with *attB*-sites attached and

936 inserted first into pDONR and then into the destination vector pTA7001-DEST (Aoyama  
937 and Chua, 1997) via the Gateway Cloning system.

938 Wildtype *Arabidopsis* plants were transformed via floral dip using *Agrobacterium*  
939 *tumefaciens* (GV3101). Positive transformed plants were selected by hygromycin  
940 selection (Harrison et al., 2006) and confirmed by Western Blot analysis using an HA-  
941 antibody after induction of leaves with 30 $\mu$ M dexamethasone. Sequences of gene-specific  
942 primers, which were used for cloning, are provided in Supplemental File 2

943

#### 944 **Protein extraction from RBL11 overexpressor plants**

945 Prior to protein extraction, approximately 50 leaves of *Arabidopsis* wildtype, or RBL11-HA  
946 overexpressor plants were cut and placed in 30 $\mu$ M DEX or water, as control. Leaves were  
947 incubated on a shaker for 48h in a plant chamber at either 21°C, or 4°C. Preparation of  
948 soluble and insoluble (membrane) protein fraction and detection of RBL11-HA using HA  
949 antibody via Western Blot was performed as described earlier (Khan et al., 2018).

950

#### 951 **Arabidopsis chloroplast envelope preparation**

952 *Arabidopsis* chloroplast envelope membranes were isolated according to an established  
953 protocol (Bouchnak et al., 2018) with few modifications. In a cold room (4°C), before onset  
954 of light, 100 to 200 g of rosette leaves were harvested from six-weeks old plants and  
955 ground in a Waring blender (three cycles, each of 2 seconds, average intensity) in the  
956 presence of grinding medium (Tricine-KOH (20 mM, pH 8.4), sorbitol (0.4 M), EDTA (10  
957 mM, pH 8), and NaHCO<sub>3</sub> (10 mM), BSA (0.1% (w/v))). The homogenate was filtered  
958 through one layer of Miracloth and centrifuged for 2 min at 2,070xg at 4°C. The  
959 supernatant was discarded, and the sediment was gently resuspended on ice with a soft  
960 natural bristle paint brush in washing medium (1x) (Tricine-KOH (10 mM, pH 7.6), sorbitol  
961 (0.4 M), MgCl<sub>2</sub> (2.5 mM), and EDTA (1.25 mM)) with a final volume of the combined  
962 chloroplast solutions = 24 ml). 6 ml of the suspension was equally distributed and loaded  
963 on top of four continuous Percoll (Sigma Aldrich, Heidelberg, Germany) gradients  
964 (containing 50% Percoll / 0.4 M sorbitol, prepared by centrifugation at 38,700xg, for 55

965 min at 4 °C). Loaded gradients were centrifuged for 10 min at 13,300xg, 4°C using a  
966 swinging-bucket rotor. The intact chloroplasts present in the lower phase were retrieved  
967 with a 10 ml pipet. The intact chloroplast suspension was washed twice with 30 ml  
968 washing buffer (1x) and centrifuged for 2 min at 2,070xg at 4°C. After washing, the purified  
969 chloroplasts were lysed by resuspending the sediment in hypotonic medium (MOPS (10  
970 mM, pH 7.8), MgCl<sub>2</sub> (4 mM), PMSF (1 mM, dissolved in isopropanol), benzamidine  
971 hydrochloride hydrate (1 mM), and ε-amino caproic acid (0.5 mM). 3 ml of lysed  
972 chloroplasts were loaded on top of two prepared sucrose gradients (4 ml of 0.93 M, 3 ml  
973 of 0.6 M and 2.5 ml of 0.3 M sucrose). Gradients were ultracentrifuged for 1 h at 70,000xg,  
974 4°C in a swinging-bucket rotor. The yellow band of both gradients (containing the  
975 envelope fraction) was retrieved and pooled in one tube. The envelope suspension was  
976 washed in 12 ml membrane washing buffer medium (MOPS (10 mM, pH 7.8), PMSF (1  
977 mM), benzamidine hydrochloride hydrate (1 mM), ε-amino caproic acid (0.5 mM) and  
978 ultracentrifuged again for 1 h at 110,000xg, 4 °C. Supernatants were aspirated by using  
979 a water pump. Approximately 100 µl of membrane washing buffer was used to resuspend  
980 the envelope sediment. Isolated envelopes were stored in liquid nitrogen until use.

981

## 982 **Bimolecular Fluorescence Complementation for interaction studies**

983 For the cloning of the BiFC constructs, the full-length sequences of *RBL11*, *FAX1* and  
984 *FTSH11* were used. The coding sequences were amplified by PCR using S7 Fusion  
985 Polymerase (MD-S7-100, Mobidiag, Espoo, Finland) and inserted first into pDONR and  
986 then into the pUBC-cYFP and the pUBC-nYFP vectors via the Gateway cloning system  
987 (Grefen et al., 2010). Half of a yellow fluorescent protein (nYFP or cYFP) is thus fused to  
988 the C- terminus of *RBL11*, *FAX1*, or *FTSH11*. The resulting constructs were then  
989 transformed into *Agrobacterium tumefaciens* strain GV3101. Transient expression in  
990 tobacco (*N. benthamiana*) leaves of RBL11, FAX1, and FTSH11, each fused to an nYFP  
991 or cYFP, was performed as described (Walter et al., 2004). *Nicotiana benthamiana* leaves  
992 were infiltrated through the lower epidermis. After 5 days, leaves were analyzed using a  
993 Leica TCS SP5II fluorescence microscope (Leica Instruments, Wetzlar, Germany) (514  
994 nm excitation and 525-582 nm detection of emission through an HCX PL APO 63 × 1.2 W  
995 water immersion objective).

996 Sequences of gene-specific primers, which were used for cloning, are provided in  
997 Supplemental File 2.

998

### 999 **Frost recovery experiment**

1000 For detection of the ability to recover from frost, a freezing tolerance test was performed  
1001 according to an established approach (Trentmann et al., 2020; Cvetkovic et al., 2021).  
1002 Survival rates and the numbers of wilted leaves were documented after 7 days of recovery  
1003 under standard growth conditions.

1004

### 1005 **Pulse Amplitude Modulation (PAM) Fluorescence Measurements**

1006 Photosystem II parameters at constant light intensities were monitored using an imaging  
1007 PAM M-Series IMAG-K7 and the ImagingWinGigE V2.56p (WALZ, Würzburg, Germany)  
1008 software. Induction curve settings were on default with 110 PAR as light intensity, 40 s  
1009 delay- and 20 s clock-time. Dark adaptation of plants lasted 10 minutes, followed by a 615  
1010 s long measurement monitoring PSII capacity ( $F_v/F_m$ ), PSII effective photochemical  
1011 quantum yield ( $Y(II)$ ), the quantum yield of light-induced non-photochemical fluorescence  
1012 quenching ( $Y(NPQ)$ ) and quantum yield of nonregulated energy dissipation ( $Y(NO)$ )  
1013 (Genty et al., 1989; Kramer et al., 2004). All plants analyzed (Col-0, FAX1 Ox#2 and FAX1  
1014 Ox#4) were grown for 28 days under short-day conditions (10/14 h; 110  $\mu$ E) at RT before  
1015 being shifted for the duration of 6 weeks to 4°C (10/14 h, 110  $\mu$ E). PAM measurements  
1016 were carried out on the day of the shift to 4°C, after one or six weeks in the cold.

1017

### 1018 **Determination of anthocyanin content**

1019 For anthocyanin quantification 1 ml of extraction buffer composed of H<sub>2</sub>O, propanol and  
1020 HCl (81:18:1) was added to 100 mg of fine grounded rosette plant material and incubated  
1021 for 3 min at 95°C, while shaking at 650 rpm and stored over night at RT in full darkness.  
1022 After centrifugation for 15 min at 12.500 rpm at RT, the supernatant was used for  
1023 photometric quantification at E1=535 nm and at E2=650 nm. The extinction was  
1024 determined and corrected ( $E_{corr}=[E_{535}-(2.2 \cdot E_{650})]$  / mg FW).

1025

1026



1027 **Metabolomics**

1028 Metabolite profiling was performed according to established protocols (Roessner et al.,  
1029 2001; Lisec et al., 2006; Erban et al., 2007). In brief, from four plants per genotype and  
1030 growth condition, 50 mg fresh weight (Fw) of ground rosette material was mixed, in a 1.5  
1031 ml reaction tube, with 180  $\mu$ l of cold (-20°C) methanol containing internal standards (10  $\mu$ l  
1032 ribitol, 0.2 mg ml<sup>-1</sup> in water and 10  $\mu$ l <sup>13</sup>C-sorbitol, 0.2 mg ml<sup>-1</sup> in water). After 15 min of  
1033 incubation at 70°C, the extract was cooled down to room temperature and carefully mixed  
1034 with 100  $\mu$ l of chloroform and 200  $\mu$ l of water. To force phase separation, a 15 min  
1035 centrifugation step at full speed was performed. Fifty  $\mu$ l of the upper (polar) phase was  
1036 dried *in vacuo* and stored at -80°C. For derivatization, the pellet was resuspended in 10  
1037  $\mu$ l of methoxyamin-hydrochloride (20 mg ml<sup>-1</sup> in pyridine) and incubated for 90 min at 40°C.  
1038 After addition of 20  $\mu$ l of BSTFA (*N,O*-bis[trimethylsilyl]trifluoroacetamide) containing 2.5  
1039  $\mu$ l retention time standard mixture of linear alkanes (n-decane, n-dodecane, n-  
1040 pentadecane, n-nonadecane, n-docosane, n-octacosane, n-dotriacontane), the  
1041 preparation was incubated at 40°C for further 45 min.

1042 One  $\mu$ l of each sample was injected into a GC–TOF–MS system (Pegasus HT, Leco, St  
1043 Joseph, USA). Samples were automatically processed by an autosampler system (Combi  
1044 PAL, CTC Analytics AG, Zwingen, Switzerland). Helium acted as carrier gas at a constant  
1045 flow rate of 1 ml min<sup>-1</sup>. Gas chromatography was performed on an Agilent GC (7890A,  
1046 Agilent, Santa Clara, CA, USA) using a 30 m VF-5ms column with 10 m EZ-Guard column.  
1047 The temperature of the split/splitless injector was set to 250°C, as well as the transfer line  
1048 and the ion source. The initial oven temperature (70°C) was linearly increased to a final  
1049 temperature of 350 °C by a rate of 9°C/min. Metabolites were ionized and fractionated by  
1050 an ion pulse of 70 eV. Mass spectra were recorded at 20 scans s<sup>-1</sup> with an *m/z* 50– 600  
1051 scanning range. Chromatograms and mass spectra were evaluated using ChromaTOF  
1052 4.72 and TagFinder 4.1 software (Luedemann et al., 2008).

1053  
1054 **RNA Extraction, cDNA synthesis and qRT-PCR**  
1055 RNA was extracted from 50 mg of frozen and fine ground rosette leaf material from four  
1056 biological replicates per genotype and growth condition using the NucleoSpin RNA Plant  
1057 Kit (Macherey-Nagel, Düren, Germany), according to the manufacturer's protocol. The

1058 synthesis of cDNA from RNA was performed with the qScript cDNA Synthesis Kit  
1059 (Quantabio, Beverly, MA, USA). Primers used for gene expression analysis via qRT-PCR  
1060 are listed in Supplemental File 2. *AtUBQ* was used as reference gene for normalization.

1061

### 1062 **Nitroblue tetrazolium (NBT) staining**

1063 For ROS staining,  $O_2^-$  was detected by nitroblue tetrazolium staining (Fryer et al., 2002)  
1064 in whole rosettes of two weeks old Arabidopsis plants cultivated as described above. For  
1065 cold treatments, plants were transferred to 4°C for four days, while control plants were  
1066 kept under standard conditions.

1067

### 1068 **Measurement of galacto-, phospho- and sulfolipids**

1069 For the analysis of lipids, plants were cultivated as described above and transferred from  
1070 standard conditions to 4°C for 2 weeks, 10 weeks, or used directly. From 5 plants per  
1071 genotype 100 mg fresh weight of rosette leaf material was harvested and immediately  
1072 placed into a glass tube containing boiling water to prevent degradation of phospholipids  
1073 through phospholipase D activity. The lipid extraction was performed with  
1074 chloroform/methanol after deactivation of lipase activities by boiling the tissue in water as  
1075 described earlier (Gasulla et al., 2013). Lipids were measured by tandem mass  
1076 spectrometry (Q-TOF 6530 Agilent Technologies) and quantified by MS/MS experiments  
1077 with internal standards following the strategy developed earlier (Gasulla et al., 2013; Welti  
1078 et al., 2002).

1079

### 1080 **Immunoblotting**

1081 Per lane, 8 µg of isolated chloroplast envelope protein or 30 µg of freshly prepared protein  
1082 extract from Arabidopsis leaf material were separated via SDS-PAGE (12%). The proteins  
1083 in the gel were transferred onto a nitrocellulose membrane by a semi-dry blotting system  
1084 (TransBlot® Turbo™ Transfer System, BIO RAD, Göttingen, Germany). The membrane  
1085 was blocked in phosphate-buffered saline plus 0.1% (v/v) Tween 20 (PBS-T) with 3% milk  
1086 powder for 1 h at room temperature, and then washed three times in PBS-T for 10 min.  
1087 The membrane was incubated with a polyclonal rabbit antibody raised against FAX1 (Li  
1088 et al., 2015) over night at 4°C at 1:1000 dilution. After three times of washing with PBS-T  
1089 for 10 min, the membrane was incubated with a horseradish peroxidase (HPR) conjugated

1090 anti-rabbit antibody (Promega, Walldorf, Germany) diluted 1:10.000 in PBS-T with 3% milk  
1091 powder for 1 h. The immunoreaction was visualized by chemiluminescence using ECL  
1092 Prime Western blotting reagent (GE Healthcare, Karlsruhe Germany) and a Fusion Solo  
1093 S6 (Vilber-Lourmat, Eberhardzell, Germany).

1094  
1095 **Peptide Mass spectrometry**  
1096 Enriched envelope fractions were precipitated in 80% acetone, digested in solution using  
1097 Lys-C and trypsin, and resulting peptides were desalted as previously described (Hammel  
1098 et al., 2018). Peptide mass spectrometry was performed using a nanoUHPLC-IM-MS  
1099 system (nanoElute coupled to timsTOF Pro2, Bruker Daltonics, Bremen, Germany).  
1100 Samples were directly loaded on a 25 cm, 75  $\mu\text{m}$  ID, 1.6  $\mu\text{m}$  particle size, C18 column  
1101 with integrated emitter (Odyssey/Aurora ionopticks, Melbourne, Australia) set to 50  $^{\circ}\text{C}$ ,  
1102 and peptides were separated under a flow rate of 0.3  $\mu\text{l}/\text{min}$  using buffers A (water, 0.1%  
1103 formic acid) and B (acetonitrile, 0.1% formic acid). The gradient employed ramped from  
1104 2% B to 25% B within 67 min, then to 37% B within 10 min, followed by washing and  
1105 equilibration steps. The MS was operated in positive mode, electrospray voltage was set  
1106 to 1.4 kV and spectra were recorded from 100 – 1700 m/z. A total of 10 MS/MS PASEF  
1107 ramps ( $1/K_0$  0.6 – 1.43  $\text{V}^*\text{s}/\text{cm}^2$ ) with 100 ms duration were acquired per cycle, and target  
1108 intensity for MS/MS was set to 14500 whereafter the precursors were excluded from  
1109 fragmentation for 0.4 min.

1110  
1111 **Protein Identification and Quantification**  
1112 Acquired data were searched against the Uniprot protein sequences for *Arabidopsis*  
1113 *thaliana* (UP000006548) using the FragPipe v19.1 processing pipeline choosing the  
1114 default LFQ-MBR workflow with minor modifications: peptide length was set to a minimum  
1115 of 6 amino acids, missed cleavages to 3, normalization of intensities across runs was  
1116 omitted. Mass spectrometry raw and processed data have been deposited at the  
1117 ProteomeXChange Consortium via the PRIDE partner repository (Perez-Riverol et al.,  
1118 2021) with the dataset identifier PXD041219.

1119  
1120

## 1121 **Data normalization and missing value imputation**

1122 Prior to computation of protein-level statistics, replicate groups were normalized using the  
1123 median-of-ratios method (Anders and Huber, 2010). Subsequently, we computed global  
1124 variance estimates and local gene-wise mean estimates to impute missing data points as  
1125 independent draws from normal distributions. When a replicate group did not contain any  
1126 measurement, the normal distribution was centered at an intensity corresponding to the  
1127 5% quantile of all intensities. Proteins were excluded from statistical analysis according to  
1128 two filter criteria. First, proteins were considered ineligible for downstream analysis if there  
1129 was no biological replicate group with at least one reading. Second, only proteins reported  
1130 to be localized to the envelope membrane were considered, either by association with  
1131 matching Gene Ontology terms retrieved from UniProt or by entry in the manually curated  
1132 AT\_CHLORO database (Ashburner et al., 2000; Bruley et al., 2012; Consortium, 2021).

1133

## 1134 **Statistical Analyses**

1135 Statistical analyses regarding the proteomic data were based on log<sub>2</sub> transformed  
1136 imputed values. According to the experimental design which consisted of two factors  
1137 (genotype and treatment) at each of two levels (wild type/mutant and normal/cold),  
1138 changes in protein abundance were evaluated using two-way analysis of variance,  
1139 ANOVA (Fisher, 1925). To account for multiple hypothesis testing, we controlled the False  
1140 Discovery Rate (FDR) by computing q-values based on the ANOVA p-values as  
1141 previously described by Storey (Storey and Tibshirani, 2003; Storey et al., 2004). All  
1142 calculations were carried out using the FSharp.Stats library for statistical computing (Venn  
1143 et al., 2023). Changes were considered to be significant if a q-value of 0.05 was not  
1144 exceeded.

1145 For statistical analysis of the numerical data GraphPad Prism 9 and Microsoft Office Excel  
1146 were used. Significant differences between two groups were analyzed by two-tailed  
1147 Student's *t*-test. The software Shiny application ([https://houssein-  
1148 assaad.shinyapps.io/TwoWayANOVA/](https://houssein-assaad.shinyapps.io/TwoWayANOVA/)) was used for letter-based representation of all  
1149 pairwise comparisons using popular statistical tests in two-way ANOVA. Statistical data is  
1150 provided in Supplemental File 1.

1151

1152 **Accession numbers**

1153 Sequence data from this article can be found in the ARAMEMNON GenBank data library  
1154 (<http://aramemnon.uni-koeln.de/>). *FAX1* (*At3g57280*), *FTSH11* (*At5g53170*), *RBL10*  
1155 (*At1g25290*), *RBL11* (*At5g25752*), *BAP1* (*At3g61190*).

1156

1157 **Acknowledgments**

1158 Work in the labs from ML, H-HK, AF MS, TM and HEN was supported by the Deutsche  
1159 Forschungsgemeinschaft (DFG) within the SFB/Transregio (TRR) 175, The Green Hub.

1160

1161

1162 **References**

1163

1164 **Abdallah F, Salamini F, Leister D** (2000) A prediction of the size and evolutionary origin of the proteome  
1165 of chloroplasts of Arabidopsis. *Trends Plant Sci.* **5**: 141-142

1166 **Adam Z, Aviv-Sharon E, Keren-Paz A, Naveh L, Rozenberg M, Savidor A, Chen J** (2019) The chloroplast  
1167 envelope protease FTSH11 – interaction with CPN60 and identification of potential substrates.  
1168 *Front. Plant Sci.* **10**

1169 **Alberdi M, Corcuera LJ** (1991) Cold-acclimation in plants. *Phytochem.* **30**: 3177-3184

1170 **Alet AI, Sanchez DH, Cuevas JC, Del Valle S, Altabella T, Tiburcio AF, Marco F, Ferrando A, Espasandín FD,**  
1171 **González ME, Ruiz OA, Carrasco P** (2011) Putrescine accumulation in *Arabidopsis thaliana*  
1172 transgenic lines enhances tolerance to dehydration and freezing stress. *Plant Sig. Behav.* **6**: 278-  
1173 286

1174 **Alia PS, Mohanty P** (1997) Involvement of proline in protecting thylakoid membranes against free radical-  
1175 induced photodamage. *J. Photochem. Photobiol.* **38**: 253-257

1176 **Anders S, Huber W** (2010) Differential expression analysis for sequence count data. *Genome Biol.* **11**: R106

1177 **Andersson MX, Dörmann P** (2009) Chloroplast membrane lipid biosynthesis and transport. *In* AS  
1178 Sandelius, H Aronsson, eds, *The Chloroplast: Interactions with the Environment*. Springer, Berlin,  
1179 Heidelberg, pp 125-158

1180 **Aoyama T, Chua NH** (1997) A glucocorticoid-mediated transcriptional induction system in transgenic  
1181 plants. *Plant J.* **11**: 605-612

1182 **Ashburner M, Ball CA, Blake JA, Botstein D, Butler H, Cherry JM, Davis AP, Dolinski K, Dwight SS, Eppig**  
1183 **JT, Harris MA, Hill DP, Issel-Tarver L, Kasarskis A, Lewis S, Matese JC, Richardson JE, Ringwald M,**  
1184 **Rubin GM, Sherlock G** (2000) Gene Ontology: tool for the unification of biology. *Nature Genetics*  
1185 **25**: 25-29

1186 **Awai K, Xu C, Tamot B, Benning C** (2006) A phosphatidic acid-binding protein of the chloroplast inner  
1187 envelope membrane involved in lipid trafficking. *Proc. Natl. Acad. Sci.* **103**: 10817-10822

1188 **Balsera M, Goetze TA, Kovács-Bogdán E, Schürmann P, Wagner R, Buchanan BB, Soll J, Bölter B** (2009)  
1189 Characterization of Tic110, a channel-forming protein at the inner envelope membrane of  
1190 chloroplasts, unveils a response to Ca<sup>2+</sup> and a stromal regulatory disulfide bridge. *J. Biol. Chem.*  
1191 **284**: 2603-2616

- 1192 **Barnes AC, Benning C, Roston RL** (2016) Chloroplast membrane remodeling during freezing stress is  
1193 accompanied by cytoplasmic acidification activating SENSITIVE TO FREEZING2 *Plant Physiol.* **171**:  
1194 2140-2149
- 1195 **Barrero-Sicilia C, Silvestre S, Haslam RP, Michaelson LV** (2017) Lipid remodelling: unravelling the response  
1196 to cold stress in *Arabidopsis* and its extremophile relative *Eutrema salsaugineum*. *Plant Sci.* **263**:  
1197 194-200
- 1198 **Barthélemy X, Bouvier G, Radunz A, Docquier S, Schmid GH, Franck F** (2000) Localization of NADPH-  
1199 protochlorophyllide reductase in plastids of barley at different greening stages. *Photosynth. Res.*  
1200 **64**: 63-76
- 1201 **Baxter A, Mittler R, Suzuki N** (2014) ROS as key players in plant stress signalling  
1202 3. *J Exp Bot* **65**: 1229-1240
- 1203 **Botté CY, Deligny M, Rocchia A, Bonneau A-L, Saïdani N, Hardré H, Aci S, Yamaryo-Botté Y, Jouhet J,**  
1204 **Dubots E, Loizeau K, Bastien O, Bréhélin L, Joyard J, Cintrat J-C, Falconet D, Block MA, Rousseau**  
1205 **B, Lopez R, Maréchal E** (2011) Chemical inhibitors of monogalactosyldiacylglycerol synthases in  
1206 *Arabidopsis thaliana*. *Nat. Chem. Biol.* **7**: 834-842
- 1207 **Bouchnak I, Moyet L, Salvi D, Kuntz M, Rolland N** (2018) Preparation of chloroplast sub-compartments  
1208 from *Arabidopsis* for the analysis of protein localization by immunoblotting or proteomics. *J. Vis.*  
1209 *Exp.*
- 1210 **Boudière L, Michaud M, Petroustos D, Rébeillé F, Falconet D, Bastien O, Roy S, Finazzi G, Rolland N,**  
1211 **Jouhet J, Block MA, Maréchal E** (2014) Glycerolipids in photosynthesis: Composition, synthesis  
1212 and trafficking. *Biochim. Biophys. Acta* **1837**: 470-480
- 1213 **Bruley C, Dupierris V, Salvi D, Rolland N, Ferro M** (2012) AT\_CHLORO: a chloroplast protein database  
1214 dedicated to sub-plastidial localization. *Front. Plant Sci.* **3**: 205-205
- 1215 **Chalker-Scott L** (1999) Environmental significance of anthocyanins in plant stress responses.  
1216 *Photochemistry and Photobiology* **70**: 1-9
- 1217 **Chen J, Burke JJ, Velten J, Xin Z** (2006) FtsH11 protease plays a critical role in *Arabidopsis* thermotolerance.  
1218 *Plant J.* **48**: 73-84
- 1219 **Choudhury FK, Rivero RM, Blumwald E, Mittler R** (2017) Reactive oxygen species, abiotic stress and stress  
1220 combination. *Plant J.* **90**: 856-867
- 1221 **Consortium GO** (2021) The Gene Ontology resource: enriching a GOld mine. *Nucleic Acids Res* **49**: D325-  
1222 d334
- 1223 **Curtis TY, Bo V, Tucker A, Halford NG** (2018) Construction of a network describing asparagine metabolism  
1224 in plants and its application to the identification of genes affecting asparagine metabolism in  
1225 wheat under drought and nutritional stress. *Food, Energy Sec.* **7**: e00126-e00126
- 1226 **Cvetkovic J, Haferkamp I, Rode R, Keller I, Pommerrenig B, Trentmann O, Altensell J, Fischer-Stettler M,**  
1227 **Eicke S, Zeeman SC, Neuhaus HE** (2021) Ectopic maltase alleviates dwarf phenotype and improves  
1228 plant frost tolerance of maltose transporter mutants. *Plant Physiol.* **186**: 315-329
- 1229 **Doke N** (1983) Generation of superoxide anion by potato tuber protoplasts during the hypersensitive  
1230 response to hyphal wall components of *Phytophthora infestans* and specific inhibition of the  
1231 reaction by suppressors of hypersensitivity. *Physiol. Plant Pathol.* **23**: 359-367
- 1232 **Dorne AJ, Joyard J, Douce R** (1990) Do thylakoids really contain phosphatidylcholine? *Proc. Natl. Acad. Sci.*  
1233 *USA* **87**: 71-74
- 1234 **Erbán A, Schauer N, Fernie AR, Kopka J** (2007) Nonsupervised construction and application of mass  
1235 spectral and retention time index libraries from time-of-flight gas chromatography-mass  
1236 spectrometry metabolite profiles. *Methods Mol. Biol.* **358**: 19-38
- 1237 **Fan J, Zhai Z, Yan C, Xu C** (2015) *Arabidopsis* TRIGALACTOSYLDIACYLGLYCEROL5 interacts with TGD1,  
1238 TGD2, and TGD4 to facilitate lipid transfer from the Endoplasmic Reticulum to plastids. *Plant Cell*  
1239 **27**: 2941-2955



- 1240 **Fisher RA** (1925) Statistical Methods for Research Workers. Oliver and Boyd, Edinburgh, Scotland
- 1241 **Fryer MJ, Oxborough K, Mullineaux PM, Baker NR** (2002) Imaging of photo-oxidative stress responses in  
1242 leaves. *J. Exp. Bot.* **53**: 1249-1254
- 1243 **Furumoto T, Yamaguchi T, Ohshima-Ichie Y, Nakamura M, Tsuchida-Iwata Y, Shimamura M, Ohnishi J,**  
1244 **Hata S, Gowik U, Westhoff P, Brautigam A, Weber AP, Izui K** (2011) A plastidial sodium-dependent  
1245 pyruvate transporter. *Nature* **476**: 472-475
- 1246 **Gao J, Lunn D, Wallis JG, Browse J** (2020) Phosphatidylglycerol composition is central to chilling damage  
1247 in the *Arabidopsis fab1* mutant. *Plant Physiol.*: pp.01219.02020
- 1248 **Garcia-Molina A, Kleine T, Schneider K, Mühlhaus T, Lehmann M, Leister D** (2020) Translational  
1249 components contribute to acclimation responses to high light, heat and cold in *Arabidopsis*.  
1250 *iScience* **23**: 101331
- 1251 **Gasulla F, vom Dorp K, Dombink I, Zähringer U, Gisch N, Dörmann P, Bartels D** (2013) The role of lipid  
1252 metabolism in the acquisition of desiccation tolerance in *Craterostigma plantagineum*: a  
1253 comparative approach. *Plant J.* **75**: 726-741
- 1254 **Genty B, Briantais J-M, Baker NR** (1989) The relationship between the quantum yield of photosynthetic  
1255 electron transport and quenching of chlorophyll fluorescence. *Biochim. Biophys. Acta* **990**: 87-92
- 1256 **Ghosh UK, Islam MN, Siddiqui MN, Cao X, Khan MAR** (2022) Proline, a multifaceted signalling molecule in  
1257 plant responses to abiotic stress: understanding the physiological mechanisms. *Plant Biol.* **24**: 227-  
1258 239
- 1259 **Greenbaum D, Colangelo C, Williams K, Gerstein M** (2003) Comparing protein abundance and mRNA  
1260 expression levels on a genomic scale. *Genome Biol.* **4**: 117
- 1261 **Grefen C, Donald N, Hashimoto K, Kudla J, Schumacher K, Blatt MR** (2010) A ubiquitin-10 promoter-based  
1262 vector set for fluorescent protein tagging facilitates temporal stability and native protein  
1263 distribution in transient and stable expression studies. *Plant J.* **64**: 355-365
- 1264 **Guan L, Denkert N, Eisa A, Lehmann M, Sjuts I, Weiberg A, Soll J, Meinecke M, Schwenkert S** (2019) JASSY,  
1265 a chloroplast outer membrane protein required for jasmonate biosynthesis. *Proc. Natl. Acad. Sci.*  
1266 **116**: 10568-10575
- 1267 **Guo L, Yang H, Zhang X, Yang S** (2013) Lipid transfer protein 3 as a target of MYB96 mediates freezing and  
1268 drought stress in *Arabidopsis*. *J. Exp. Bot.* **64**: 1755-1767
- 1269 **Guo X, Liu D, Chong K** (2018) Cold signaling in plants: Insights into mechanisms and regulation. *J. Integr.*  
1270 *Plant Biol.* **60**: 745-756
- 1271 **Gygi SP, Rist B, Gerber SA, Turecek F, Gelb MH, Aebersold R** (1999) Quantitative analysis of complex  
1272 protein mixtures using isotope-coded affinity tags. *Nat. Biotechnol.* **17**: 994-999
- 1273 **Hagio M, Sakurai I, Sato S, Kato T, Tabata S, Wada H** (2002) Phosphatidylglycerol is essential for the  
1274 development of thylakoid membranes in *Arabidopsis thaliana*. *Plant, Cell Physiol.* **43**: 1456-1464
- 1275 **Hammel A, Zimmer D, Sommer F, Mühlhaus T, Schroda M** (2018) Absolute quantification of major  
1276 photosynthetic protein complexes in *Chlamydomonas reinhardtii* using quantification  
1277 concatamers (QconCATs). *Front. Plant Sci.* **9**
- 1278 **Harrison SJ, Mott EK, Parsley K, Aspinall S, Gray JC, Cottage A** (2006) A rapid and robust method of  
1279 identifying transformed *Arabidopsis thaliana* seedlings following floral dip transformation. *Plant*  
1280 *Methods* **2**: 19
- 1281 **Hoffmann C, Plochanski B, Haferkamp I, Leroch M, Ewald R, Bauwe H, Riemer J, Herrmann JM, Neuhaus**  
1282 **HE** (2013) From endoplasmic reticulum to mitochondria: absence of the *Arabidopsis* ATP  
1283 antiporter Endoplasmic Reticulum Adenylate Transporter1 perturbs photorespiration. *Plant Cell*  
1284 **25**: 2647-2660
- 1285 **Hölzl G, Dörmann P** (2019) Chloroplast lipids and their biosynthesis. *Ann. Rev. Plant Biol.* **70**: 51-81
- 1286 **Kerppola TK** (2008) Bimolecular fluorescence complementation (BiFC) analysis as a probe of protein  
1287 interactions in living cells. *Ann. Rev. Biophys.* **37**: 465-487

- 1288 **Khan M, Youn JY, Gingras AC, Subramaniam R, Desveaux D** (2018) In planta proximity dependent biotin  
1289 identification (BioID). *Sci. Rep.* **8**: 9212
- 1290 **Khodakovskaya M, McAvoy R, Peters J, Wu H, Li Y** (2006) Enhanced cold tolerance in transgenic tobacco  
1291 expressing a chloroplast  $\omega$ -3 fatty acid desaturase gene under the control of a cold-inducible  
1292 promoter. *Planta* **223**: 1090-1100
- 1293 **Knopf RR, Feder A, Mayer K, Lin A, Rozenberg M, Schaller A, Adam Z** (2012) Rhomboid proteins in the  
1294 chloroplast envelope affect the level of allene oxide synthase in *Arabidopsis thaliana*. *Plant J.* **72**:  
1295 559-571
- 1296 **Kobayashi K** (2016) Role of membrane glycerolipids in photosynthesis, thylakoid biogenesis and  
1297 chloroplast development. *J. Plant Res.* **129**: 565-580
- 1298 **Koevoets IT, Venema JH, Elzenga JTM, Testerink C** (2016) Roots withstanding their environment:  
1299 exploiting root system architecture responses to abiotic stress to improve crop tolerance. *Front.*  
1300 *Plant Sci.* **7**
- 1301 **Koussounadis A, Langdon SP, Um IH, Harrison DJ, Smith VA** (2015) Relationship between differentially  
1302 expressed mRNA and mRNA-protein correlations in a xenograft model system. *Scientific Rep.* **5**:  
1303 10775
- 1304 **Kramer DM, Johnson G, Kiirats O, Edwards GE** (2004) New fluorescence parameters for the determination  
1305 of QA redox state and excitation energy fluxes. *Photosynth. Res.* **79**: 209
- 1306 **Kunst L, Browse J, Somerville C** (1988) Altered regulation of lipid biosynthesis in a mutant of *Arabidopsis*  
1307 deficient in chloroplast glycerol-3-phosphate acyltransferase activity. *Proc. Natl. Acad. Sci. USA* **85**:  
1308 4143-4147
- 1309 **Lavell A, Froehlich JE, Baylis O, Rotondo AD, Benning C** (2019) A predicted plastid rhomboid protease  
1310 affects phosphatidic acid metabolism in *Arabidopsis thaliana*. *Plant J.* **99**: 978-987
- 1311 **Lavell AA, Benning C** (2019) Cellular organization and regulation of plant glycerolipid metabolism. *Plant*  
1312 *Cell Physiol.* **60**: 1176-1183
- 1313 **Li-Beisson Y, Neunzig J, Lee Y, Philippar K** (2017) Plant membrane-protein mediated intracellular traffic of  
1314 fatty acids and acyl lipids. *Curr. Opin. Plant Biol.* **40**: 138-146
- 1315 **Li-Beisson Y, Shorrosh B, Beisson F, Andersson MX, Arondel V, Bates PD, Baud S, Bird D, Debono A,**  
1316 **Durrett TP, Franke RB, Graham IA, Katayama K, Kelly AA, Larson T, Markham JE, Miquel M,**  
1317 **Molina I, Nishida I, Rowland O, Samuels L, Schmid KM, Wada H, Welti R, Xu C, Zallot R, Ohlrogge**  
1318 **J** (2010) Acyl-lipid metabolism. *The Arabidopsis Book* **8**: e0133-e0133
- 1319 **Li N, Gügel IL, Giavalisco P, Zeisler V, Schreiber L, Soll J, Philippar K** (2015) FAX1, a novel membrane protein  
1320 mediating plastid fatty acid export. *PLoS Biol.* **13**: e1002053
- 1321 **Li N, Xu C, Li-Beisson Y, Philippar K** (2016) Fatty acid and lipid transport in plant cells. *Trends Plant Sci.* **21**:  
1322 145-158
- 1323 **Li Q, Zheng Q, Shen W, Cram D, Fowler DB, Wei Y, Zou J** (2015) Understanding the biochemical basis of  
1324 temperature-induced lipid pathway adjustments in plants. *Plant Cell* **27**: 86-103
- 1325 **Liang X, Zhang L, Natarajan SK, Becker DF** (2013) Proline mechanisms of stress survival. *Antioxidants &*  
1326 *Redox Signaling* **19**: 998-1011
- 1327 **Lin Y-S, Medlyn BE, Ellsworth DS** (2012) Temperature responses of leaf net photosynthesis: the role of  
1328 component processes. *Tree Physiology* **32**: 219-231
- 1329 **Lisec J, Schauer N, Kopka J, Willmitzer L, Fernie AR** (2006) Gas chromatography mass spectrometry-based  
1330 metabolite profiling in plants. *Nature Prot.* **1**: 387-396
- 1331 **Lu B, Xu C, Awai K, Jones AD, Benning C** (2007) A small ATPase protein of *Arabidopsis*, TGD3, involved in  
1332 chloroplast lipid import. *J. Biol. Chem.* **282**: 35945-35953
- 1333 **Luedemann A, Strassburg K, Erban A, Kopka J** (2008) TagFinder for the quantitative analysis of gas  
1334 chromatography-mass spectrometry (GC-MS)-based metabolite profiling experiments.  
1335 *Bioinformatics* **24**: 732-737

- 1336 **Mackey KR, Paytan A, Caldeira K, Grossman AR, Moran D, McIlvin M, Saito MA** (2013) Effect of  
1337 temperature on photosynthesis and growth in marine *Synechococcus spp.* *Plant Physiol.* **163**: 815-  
1338 829
- 1339 **Marco F, Busó E, Lafuente T, Carrasco P** (2019) Spermine confers stress resilience by modulating abscisic  
1340 acid biosynthesis and stress responses in Arabidopsis plants. *Front. Plant Sci.* **10**
- 1341 **Mielke K, Wagner R, Mishra LS, Demir F, Perrar A, Huesgen PF, Funk C** (2020) FtsH12 abundance  
1342 modulates chloroplast development in *Arabidopsis thaliana*. *J. Exp. Bot.*
- 1343 **Miquel M, James D, Jr., Dooner H, Browse J** (1993) Arabidopsis requires polyunsaturated lipids for low-  
1344 temperature survival. *Proc. Natl. Acad. Sci. USA* **90**: 6208-6212
- 1345 **Moellering ER, Muthan B, Benning C** (2010) Freezing tolerance in plants requires lipid remodeling at the  
1346 outer chloroplast membrane. *Science* **330**: 226-228
- 1347 **Murchie EH, Lawson T** (2013) Chlorophyll fluorescence analysis: a guide to good practice and  
1348 understanding some new applications. *J. Exp. Bot.* **64**: 3983-3998
- 1349 **Nakamura Y** (2017) Plant phospholipid diversity: emerging functions in metabolism and protein-lipid  
1350 interactions. *Trends Plant Sci.* **22**: 1027-1040
- 1351 **Niittylä T, Messerli G, Trevisan M, Chen J, Smith AM, Zeeman SC** (2004) A previously unknown maltose  
1352 transporter essential for starch degradation in leaves. *Science* **303**: 87-89
- 1353 **Nishimura K, Kato Y, Sakamoto W** (2016) Chloroplast proteases: updates on proteolysis within and across  
1354 suborganellar compartments. *Plant Physiol.* **171**: 2280-2293
- 1355 **Obata T, Fernie AR** (2012) The use of metabolomics to dissect plant responses to abiotic stresses. *Cell.*  
1356 *Mol. Life Sci.* **69**: 3225-3243
- 1357 **Parthasarathy A, Savka MA, Hudson AO** (2019) The synthesis and role of  $\beta$ -alanine in plants. *Front. Plant*  
1358 *Sci.* **10**: 921
- 1359 **Pattanayak GK, Tripathy BC** (2011) Overexpression of protochlorophyllide oxidoreductase C regulates  
1360 oxidative stress in Arabidopsis. *PLoS ONE* **6**: e26532
- 1361 **Patzke K, Prananingrum P, Klemens PAW, Trentmann O, Martins Rodrigues C, Keller I, Fernie AR,**  
1362 **Geigenberger P, Bölter B, Lehmann M, Schmitz-Esser S, Pommerrenig B, Haferkamp I, Neuhaus**  
1363 **HE** (2019) The plastidic sugar transporter pSuT influences flowering and affects cold responses.  
1364 *Plant Physiol.* **179**: 569-587
- 1365 **Perez-Riverol Y, Bai J, Bandla C, García-Seisdedos D, Hewapathirana S, Kamatchinathan S, Kundu**  
1366 **Deepti J, Prakash A, Frericks-Zipper A, Eisenacher M, Walzer M, Wang S, Brazma A, Vizcaíno**  
1367 **Juan A** (2021) The PRIDE database resources in 2022: a hub for mass spectrometry-based  
1368 proteomics evidences. *Nucleic Acids Res.* **50**: D543-D552
- 1369 **Perrett M, Gothard M, Ludwig A, Rouhier KA** (2017) Identifying a source of  $\beta$ -alanine and its broader  
1370 implications in *Arabidopsis thaliana* by GC/MS. *FASEB J.* **31**: 626.621-626.621
- 1371 **Pommerrenig B, Ludewig F, Cvetkovic J, Trentmann O, Klemens PAW, Neuhaus HE** (2018) In concert:  
1372 orchestrated changes in carbohydrate homeostasis are critical for plant abiotic stress tolerance.  
1373 *Plant, Cell Physiol.* **59**: 1290-1299
- 1374 **Pospíšil P** (2016) Production of reactive oxygen species by photosystem II as a response to light and  
1375 temperature stress. *Front. Plant Sci.* **7**: 1950
- 1376 **Pottosin I, Shabala S** (2016) Transport across chloroplast membranes: optimizing photosynthesis for  
1377 adverse environmental conditions. *Mol. Plant* **9**: 356-370
- 1378 **Rawsthorne S** (2002) Carbon flux and fatty acid synthesis in plants. *Prog. Lipid Res.* **41**: 182-196
- 1379 **Roessner U, Lüdemann A, Brust D, Fiehn O, Linke T, Willmitzer L, Fernie A** (2001) Metabolic profiling  
1380 allows comprehensive phenotyping of genetically or environmentally modified plant systems.  
1381 *Plant Cell* **13**: 11-29
- 1382 **Roughan PG, Slack CR** (1982) Cellular organization of glycerolipid metabolism. *Ann. Rev. Plant Physiol.* **33**:  
1383 97-132

- 1384 **Roux KJ, Kim DI, Raida M, Burke B** (2012) A promiscuous biotin ligase fusion protein identifies proximal  
1385 and interacting proteins in mammalian cells. *J. Cell Biol.* **196**: 801-810
- 1386 **Schnurr JA, Shockey JM, de Boer GJ, Browse JA** (2002) Fatty acid export from the chloroplast. Molecular  
1387 characterization of a major plastidial acyl-coenzyme A synthetase from *Arabidopsis*. *Plant Physiol.*  
1388 **129**: 1700-1709
- 1389 **Schreiber U** (2004) Pulse-Amplitude-Modulation (PAM) fluorometry and saturation pulse method: an  
1390 overview. In GC Papageorgiou, Govindjee, eds, *Chlorophyll a Fluorescence: A Signature of*  
1391 *Photosynthesis*. Springer Netherlands, Dordrecht, pp 279-319
- 1392 **Schwenkert S, Fernie AR, Geigenberger P, Leister D, Möhlmann T, Naranjo B, Neuhaus HE** (2022)  
1393 Chloroplasts are key players to cope with light and temperature stress. *Trends Plant Sci.* **in press**
- 1394 **Schwenkert S, Lo WT, Szulc B, Yip CK, Pratt AI, Cusack SA, Brandt B, Leister D, Kunz HH** (2023) Probing  
1395 the physiological role of the plastid outer-envelope membrane using the oemiR plasmid collection.  
1396 *G3 (Bethesda)*
- 1397 **Short JM, Fernandez JM, Sorge JA, Huse WD** (1988) Lambda ZAP: a bacteriophage lambda expression  
1398 vector with in vivo excision properties. *Nucleic Acids Res.* **16**: 7583-7600
- 1399 **Smallwood M, Bowles DJ** (2002) Plants in a cold climate. *Philos. Trans. R Soc. Lond. B Biol. Sci.* **357**: 831-  
1400 847
- 1401 **Song Y, Chen Q, Ci D, Shao X, Zhang D** (2014) Effects of high temperature on photosynthesis and related  
1402 gene expression in poplar. *BMC Plant Biol.* **14**: 111
- 1403 **Steponkus PL, Garber MP, Myers SP, Lineberger RD** (1977) Effects of cold acclimation and freezing on  
1404 structure and function of chloroplast thylakoids. *Cryobiology* **14**: 303-321
- 1405 **Storey JD, Taylor JE, Siegmund D** (2004) Strong control, conservative point estimation and simultaneous  
1406 conservative consistency of false discovery rates: A unified approach. *J. Royal Stat. Soc.* **66**: 187-  
1407 205
- 1408 **Storey JD, Tibshirani R** (2003) Statistical significance for genomewide studies. *Proc. Nat. Acad. Sci.* **100**:  
1409 9440-9445
- 1410 **Takemura T, Imamura S, Tanaka K** (2019) Identification of a chloroplast fatty acid exporter protein,  
1411 *CmFAX1*, and triacylglycerol accumulation by its overexpression in the unicellular red alga  
1412 *Cyanidioschyzon merolae*. *Algal Res.* **38**: 101396
- 1413 **Taylor NL, Tan Y-F, Jacoby RP, Millar AH** (2009) Abiotic environmental stress induced changes in the  
1414 *Arabidopsis thaliana* chloroplast, mitochondria and peroxisome proteomes. *J. Proteom.* **72**: 367-  
1415 378
- 1416 **Tian Y, Lv X, Xie G, Wang L, Dai T, Qin X, Chen F, Xu Y** (2019) FAX2 mediates fatty acid export from plastids  
1417 in developing *Arabidopsis* seeds. *Plant Cell Physiol.* **60**: 2231-2242
- 1418 **Tjaden J, Schwöppe C, Möhlmann T, Neuhaus HE** (1998) Expression of the plastidic ATP/ADP transporter  
1419 gene in *Escherichia coli* leads to a functional adenine nucleotide transport system in the bacterial  
1420 cytoplasmic membrane. *J. Biol. Chem.* **273**: 9630-9636
- 1421 **Trentmann O, Mühlhaus T, Zimmer D, Sommer F, Schroda M, Haferkamp I, Keller I, Pommerrenig B,**  
1422 **Neuhaus HE** (2020) Identification of chloroplast envelope proteins with critical importance for cold  
1423 acclimation. *Plant Physiol.* **182**: 1239-1255
- 1424 **van Meer G, Voelker DR, Feigenson GW** (2008) Membrane lipids: where they are and how they behave.  
1425 *Nat. Rev. Mol. Cell Biol.* **9**: 112-124
- 1426 **Venn B, Mühlhaus T, Schneider K, Weil L, Zimmer D** (2023) FSharp.Stats: Release 0.4.11. . Zenodo
- 1427 **Wagner R, Aigner H, Pružinská A, Jänkänpää HJ, Jansson S, Funk C** (2011) Fitness analyses of *Arabidopsis*  
1428 *thaliana* mutants depleted of FtsH metalloproteases and characterization of three FtsH6 deletion  
1429 mutants exposed to high light stress, senescence and chilling. *New Phytol.* **191**: 449-458
- 1430 **Wagner R, von Sydow L, Aigner H, Netotea S, Brugière S, Sjögren L, Ferro M, Clarke A, Funk C** (2016)  
1431 Deletion of FtsH11 protease has impact on chloroplast structure and function in *Arabidopsis*  
1432 *thaliana* when grown under continuous light. *Plant, Cell Environ.* **39**: 2530-2544



- 1433 **Walker B, Ariza LS, Kaines S, Badger MR, Cousins AB** (2013) Temperature response of in vivo Rubisco  
1434 kinetics and mesophyll conductance in *Arabidopsis thaliana*: comparisons to *Nicotiana tabacum*.  
1435 Plant Cell Environ. **36**: 2108-2119
- 1436 **Walter M, Chaban C, Schütze K, Batistic O, Weckermann K, Näke C, Blazevic D, Grefen C, Schumacher K,**  
1437 **Oecking C, Harter K, Kudla J** (2004) Visualization of protein interactions in living plant cells using  
1438 bimolecular fluorescence complementation. Plant J. **40**: 428-438
- 1439 **Wang P, Hsu C-C, Du Y, Zhu P, Zhao C, Fu X, Zhang C, Paez JS, Macho AP, Tao WA, Zhu J-K** (2020) Mapping  
1440 proteome-wide targets of protein kinases in plant stress responses. Proc. Natl. Acad. Sci. **117**:  
1441 3270–3280
- 1442 **Wang Z, Benning C** (2012) Chloroplast lipid synthesis and lipid trafficking through ER–plastid membrane  
1443 contact sites. Biochem. Soc. Trans. **40**: 457-463
- 1444 **Welti R, Li W, Li M, Sang Y, Biesiada H, Zhou HE, Rajashekar CB, Williams TD, Wang X** (2002) Profiling  
1445 membrane lipids in plant stress responses. Role of phospholipase D alpha in freezing-induced lipid  
1446 changes in Arabidopsis. J. Biol. Chem. **277**: 31994-32002
- 1447 **Witz S, Panwar P, Schober M, Deppe J, Pasha FA, Lemieux MJ, Möhlmann T** (2014) Structure-function  
1448 relationship of a plant NCS1 member--homology modeling and mutagenesis identified residues  
1449 critical for substrate specificity of PLUTO, a nucleobase transporter from Arabidopsis. PLoS ONE **9**:  
1450 e91343
- 1451 **Xiao Z, Tang F, Zhang L, Li S, Wang S, Huo Q, Yang B, Zhang C, Wang D, Li Q, Wei L, Guo T, Qu C, Lu K,**  
1452 **Zhang Y, Guo L, Li J, Li N** (2021) The *Brassica napus* fatty acid exporter FAX1-1 contributes to  
1453 biological yield, seed oil content, and oil quality. Biotechnol. Biofuels **14**: 190
- 1454 **Xu C, Moellering ER, Muthan B, Fan J, Benning C** (2010) Lipid transport mediated by Arabidopsis TGD  
1455 proteins is unidirectional from the endoplasmic reticulum to the plastid. Plant Cell Physiol. **51**:  
1456 1019-1028
- 1457 **Xu Y, Kambhampati S, Morley SA, Cook R, Froehlich J, Allen DK, Benning C** (2023) Arabidopsis ACYL  
1458 CARRIER PROTEIN4 and RHOMBOID LIKE10 act independently in chloroplast phosphatidate  
1459 synthesis. Plant Physiol.
- 1460 **Yang H, Yang S, Li Y, Hua J** (2007) The Arabidopsis BAP1 and BAP2 genes are general inhibitors of  
1461 programmed cell death. Plant Physiol. **145**: 135-146
- 1462 **Yu L, Shen W, Fan J, Sah SK, Mavraganis I, Wang L, Gao P, Gao J, Zheng Q, Meesapyodsuk D, Yang H, Li**  
1463 **Q, Zou J, Xu C** (2023) A chloroplast diacylglycerol lipase modulates glycerolipid pathway balance  
1464 in Arabidopsis. Plant J. **in press**
- 1465 **Zhang J, Yang D, Li M, Shi L** (2016) Metabolic profiles reveal changes in wild and cultivated soybean  
1466 seedling leaves under salt stress. PloS One **11**: e0159622-e0159622
- 1467 **Zhang Y, Zhu H, Zhang Q, Li M, Yan M, Wang R, Wang L, Welti R, Zhang W, Wang X** (2009) Phospholipase  
1468 Dα1 and phosphatidic acid regulate NADPH oxidase activity and production of reactive oxygen  
1469 species in ABA-mediated stomatal closure in Arabidopsis. Plant Cell **21**: 2357-2377
- 1470 **Zheng G, Tian B, Zhang F, Tao F, Li W** (2011) Plant adaptation to frequent alterations between high and  
1471 low temperatures: remodelling of membrane lipids and maintenance of unsaturation levels. Plant,  
1472 Cell Environ. **34**: 1431-1442
- 1473 **Zhu L, He S, Liu Y, Shi J, Xu J** (2020) Arabidopsis FAX1 mediated fatty acid export is required for the  
1474 transcriptional regulation of anther development and pollen wall formation. Plant Mol. Biol. **104**:  
1475 187-201
- 1476 **Zhu Y, Yang H, Mang H-G, Hua J** (2011) Induction of *BAP1* by a moderate decrease in temperature is  
1477 mediated by *ICE1* in Arabidopsis. Plant Physiol. **155**: 580-588

1478
